# Supplementary material for: The Dendrobium catenatum Lindl. genome sequence provides insights into polysaccharide synthase, floral development and adaptive evolution
Source: Sci Rep. 2016 Jan 12;6:19029. doi: 10.1038/srep19029 (PMC4709516; doi:10.1038/srep19029)
Supplement: Supplementary Information [file srep19029-s1.pdf]

## Supplementary Information

### **The *Dendrobium catenatum* Lindl. genome sequence provides insights into polysaccharide synthase, floral development and adaptive evolution**

Guo-Qiang Zhang<sup>1\*</sup>, Qing Xu<sup>2\*</sup>, Chao Bian<sup>3\*</sup>, Wen-Chieh Tsai<sup>4, 5, 6\*</sup>, Chuan-Ming Yeh<sup>7\*</sup>, Ke-Wei Liu<sup>8\*</sup>, Kouki Yoshida<sup>9\*</sup>, Liang-Sheng Zhang<sup>10\*</sup>, Song-Bin Chang<sup>4</sup>, Fei Chen<sup>11</sup>, Yu Shi<sup>1, 12</sup>, Yong-Yu Su<sup>1, 12</sup>, Yong-Qiang Zhang<sup>1</sup>, Li-Jun Chen<sup>1</sup>, Yayi Yin<sup>1</sup>, Min Lin<sup>1</sup>, Huixia Huang<sup>1</sup>, Hua Deng<sup>13</sup>, Zhi-Wen Wang<sup>14</sup>, Shi-Lin Zhu<sup>14</sup>, Xiang Zhao<sup>14</sup>, Cao Deng<sup>14</sup>, Shan-Ce Niu<sup>2</sup>, Jie Huang<sup>1</sup>, Meina Wang<sup>1</sup>, Guo-Hui Liu<sup>1</sup>, Hai-Jun Yang<sup>1, 12</sup>, Xin-Ju Xiao<sup>1</sup>, Yu-Yun Hsiao<sup>5</sup>, Wan-Lin Wu<sup>1, 5</sup>, You-Yi Chen<sup>4, 5</sup>, Nobutaka Mitsuda<sup>15</sup>, Masaru Ohme-Takagi<sup>7, 15</sup>, Yi-Bo Luo<sup>2†</sup>, Yves Van de Peer<sup>16, 17, 18†</sup>, Zhong-Jian Liu<sup>1, 8, 12†</sup>

\*These authors contributed equally to this work.

Correspondence and requests for materials should be addressed to Z-J.L.

(liuzj@sinicaorchid.org), Y. V. d. P. (yves.vandeppeer@psb.vib-ugent.be), Y-B.L.

(luoyb@ibcas.ac.cn).

# Content

|    |                                                                                                            |    |
|----|------------------------------------------------------------------------------------------------------------|----|
| 1  |                                                                                                            |    |
| 2  | Supplementary Notes.....                                                                                   | 5  |
| 3  | Supplementary Note 1. Plant material .....                                                                 | 5  |
| 4  | Supplementary Note 2. Chromosome preparation .....                                                         | 5  |
| 5  | Supplementary Note 3. Transposable element analysis .....                                                  | 6  |
| 6  | Supplementary Note 4. Gene prediction .....                                                                | 6  |
| 7  | Supplementary Note 5. Gene family annotation .....                                                         | 7  |
| 8  | Supplementary Note 6. Collinearity identification and WGD time estimation .....                            | 8  |
| 9  | Supplementary Note 7. Proposed biosynthetic pathway of GM and GGM in <i>D. catenatum</i> stem              |    |
| 10 | .....                                                                                                      | 8  |
| 11 | Supplementary Figures .....                                                                                | 10 |
| 12 | Supplementary Figure 1. Propidium iodide (PI) stained chromosomes at metaphase,                            |    |
| 13 | prometaphase and interphase stages.....                                                                    | 10 |
| 14 | Supplementary Figure 2. Estimation of genome size based on 17-mer distribution .....                       | 11 |
| 15 | Supplementary Figure 3. Comparison of the lengths of scaffolds assembled using the                         |    |
| 16 | SOAPdenovo2 and Platanus software programs, respectively .....                                             | 12 |
| 17 | Supplementary Figure 4. Distribution of the sequencing depth of the assembled genome of <i>D.</i>          |    |
| 18 | <i>catenatum</i> .....                                                                                     | 13 |
| 19 | Supplementary Figure 5. Distribution of divergence times for the complete long terminal                    |    |
| 20 | repeats (LTRs) in <i>D. catenatum</i> . ....                                                               | 14 |
| 21 | Supplementary Figure 6. Gene models were supported by evidence from <i>de novo</i> prediction,             |    |
| 22 | protein-based homology searches and RNA-seq data. ....                                                     | 15 |
| 23 | Supplementary Figure 7. Gene length distribution for seven plant species. ....                             | 16 |
| 24 | Supplementary Figure 8. Gene family expansion and contraction in different flowering plant                 |    |
| 25 | lineages, mapped on the phylogenetic tree of Figure 1. ....                                                | 17 |
| 26 | Supplementary Figure 9. Distribution of single nucleotide polymorphisms (SNPs) in the <i>D.</i>            |    |
| 27 | <i>catenatum</i> genome .....                                                                              | 18 |
| 28 | Supplementary Figure 10. Evolution of selected heat shock protein ( <i>Hsp</i> ) gene families. ....       | 19 |
| 29 | Supplementary Figure 11. Comparison of distributions of <i>D. catenatum</i> and <i>P. equestris</i>        |    |
| 30 | (modified from Cribb <sup>19</sup> and drawn by Li-Jun Chen using Photoshop 8.0.1 <sup>20</sup> ).....     | 20 |
| 31 | Supplementary Figure 12. Phylogenetic tree of <i>CsIA</i> . ....                                           | 21 |
| 32 | Supplementary Figure 13. Heat map showing the expression of <i>CsIA</i> genes in four tissues of <i>D.</i> |    |
| 33 | <i>catenatum</i> .....                                                                                     | 22 |
| 34 | Supplementary Figure 14. The phylogenetic tree of <i>CsID</i> . ....                                       | 23 |
| 35 | Supplementary Figure 15. Heat map showing the transcriptome expression of <i>CsID</i> genes in             |    |
| 36 | four tissues of <i>D. catenatum</i> . ....                                                                 | 24 |
| 37 | Supplementary Figure 16. Expression levels of Arabidopsis <i>CsIA</i> and <i>CsID</i> genes in response to |    |
| 38 | abiotic stresses .....                                                                                     | 25 |
| 39 | Supplementary Figure 17. Heat map showing the transcriptome expression of <i>GH5</i> genes in              |    |
| 40 | four tissues of <i>D. catenatum</i> .....                                                                  | 26 |
| 41 | Supplementary Figure 18. The phylogenetic tree of <i>GH5</i> gene families. ....                           | 27 |
| 42 | Supplementary Figure 19. Expression levels of Arabidopsis and rice <i>GH5</i> genes in response to         |    |
| 43 | abiotic stresses .....                                                                                     | 28 |
| 44 | Supplementary Figure 20. Orthologous genes found in different plant species. ....                          | 29 |

|    |                                                                                                          |    |
|----|----------------------------------------------------------------------------------------------------------|----|
| 1  | Supplementary Figure 21. Venn diagram showing unique and shared gene families among                      |    |
| 2  | members of Orchidaceae, dicots and Poaceae, and <i>M. acuminata</i> and <i>Ph. dactylifera</i> .....     | 30 |
| 3  | Supplementary Figure 22. Phylogenetic tree of Type II MADS-box genes from <i>O. sativa</i> (Os),         |    |
| 4  | <i>A. thaliana</i> (At), <i>P. equestris</i> (PEQU) and <i>D. catenatum</i> (Dc) .....                   | 31 |
| 5  | Supplementary Figure 23. Phylogenetic tree of Type I MADS-box genes from <i>O. sativa</i> (Os),          |    |
| 6  | <i>A. thaliana</i> (At), <i>P. equestris</i> (PEQU) and <i>D. catenatum</i> (Dc). .....                  | 32 |
| 7  | Supplementary Figure 24. Phylogenetic tree of <i>Dendrobium</i> based on nr ITS and plastid DNA          |    |
| 8  | .....                                                                                                    | 33 |
| 9  | Supplementary Figure 25. Pearson's correlation analysis between intron length and intronic TE            |    |
| 10 | length for .....                                                                                         | 34 |
| 11 | Supplementary Figure 26. Five-way Venn diagrams showing unique and shared gene families                  |    |
| 12 | among different plant species.....                                                                       | 35 |
| 13 | Supplementary Tables .....                                                                               | 36 |
| 14 | Supplementary Table 1. Summary of data generated for the <i>D. catenatum</i> genome sequencing           |    |
| 15 | with HiSeq 2000 <sup>a</sup> .....                                                                       | 36 |
| 16 | Supplementary Table 2. Summary of the <i>D. catenatum</i> genome assembly with Platanus .....            | 37 |
| 17 | Supplementary Table 3. CEGMA evaluation for the completeness of the <i>D. catenatum</i> genome           |    |
| 18 | assembly.....                                                                                            | 38 |
| 19 | Supplementary Table 4. Evaluation of the <i>D. catenatum</i> genome completeness using data set of       |    |
| 20 | RNA transcripts.....                                                                                     | 39 |
| 21 | Supplementary Table 5. Statistics for repetitive elements in the <i>D. catenatum</i> genome .....        | 40 |
| 22 | Supplementary Table 6. Gene models supported by differing evidence types .....                           | 41 |
| 23 | Supplementary Table 7. Statistics of gene element length for seven sequenced plant species ..            | 42 |
| 24 | Supplementary Table 8. Statistics for noncoding RNAs in <i>D. catenatum</i> .....                        | 43 |
| 25 | Supplementary Table 9. GO term enrichment results of significantly expanded gene families in             |    |
| 26 | the <i>D. catenatum</i> lineage.....                                                                     | 44 |
| 27 | Supplementary Table 10. KEGG pathway enrichment results for SNP-related genes .....                      | 45 |
| 28 | Supplementary Table 11. GO term enrichment results for SNP-related genes.....                            | 46 |
| 29 | Supplementary Table 12. Tandem duplicated genes in <i>D. catenatum</i> shown as gene pairs .....         | 48 |
| 30 | Supplementary Table 13. Tandem duplicated genes in <i>P. equestris</i> shown as gene pairs .....         | 48 |
| 31 | Supplementary Table 14. List of the resistant genes of <i>D. catenatum</i> and <i>P. equestris</i> ..... | 49 |
| 32 | Supplementary Table 15. Summary of orthologous gene families in 12 sequenced plant species               |    |
| 33 | .....                                                                                                    | 50 |
| 34 | Supplementary Table 16. List of the putative genes involved in GM/GGM synthesis and                      |    |
| 35 | hydrolysis in the <i>D. catenatum</i> genome .....                                                       | 51 |
| 36 | Supplementary Table 17. List of the 75 MADS-box genes identified in <i>D. catenatum</i> .....            | 53 |
| 37 | Supplementary Table 18. Summary of the <i>D. catenatum</i> genome assembly obtained with                 |    |
| 38 | SOAPdenovo2 .....                                                                                        | 55 |
| 39 | Supplementary Table 19. Statistics of annotation results from various prediction methods .....           | 56 |
| 40 | Supplementary Table 20. Statistics for gene function assignments from different databases ....           | 57 |
| 41 | Supplementary Table 21. Enriched KEGG pathways for <i>D. catenatum</i> specific gene families.           | 58 |
| 42 | Supplementary Table 22. GO term enrichment results for Orchidaceae-specific gene families.               | 59 |
| 43 | Supplementary Table 23. KEGG pathway enrichment results for Orchidaceae-specific gene                    |    |
| 44 | families.....                                                                                            | 60 |

|   |                                                                                                    |    |
|---|----------------------------------------------------------------------------------------------------|----|
| 1 | Supplementary Table 24. GO term enrichment results for monocot-specific gene families .....        | 61 |
| 2 | Supplementary Table 25. KEGG pathway enrichment results for monocot-specific gene                  |    |
| 3 | families.....                                                                                      | 62 |
| 4 | Supplementary Table 26. The sequences of konjac EST clones used in the <i>CsIA</i> and <i>CsID</i> |    |
| 5 | phylogenetic trees .....                                                                           | 63 |
| 6 | Supplementary References .....                                                                     | 64 |
| 7 |                                                                                                    |    |

## Supplementary Notes

### Supplementary Note 1. Plant material

*Dendrobium catenatum* is often confused with similar species such as *D. scoriarum* W. W. Smith, *D. moniliforme* (Linnaeus) Swartz, *D. huoshanense* C. Z. Tang & S. J. Cheng, and with many artificial hybrids that are cultured to produce health food<sup>1, 2</sup>. The closest sister species of *D. catenatum* is considered to be *D. scoriarum* (Supplementary Figure 24). Given that hybridisation is common in cultivation, to ensure that a true *D. catenatum* and not a hybrid, such as *D. catenatum* × *D. scoriarum*, was used as material for genome sequencing, we collected plant samples of *D. catenatum* from the wild as permitted by the Chinese Government, in 2010. We collected wild plants from Guangnan in Yunnan, Xinning in Hunan and Langshan in Hunan, China. The characteristics of the collected plants were consistent with those of *D. catenatum* as described in the *Flora of China* 25<sup>1</sup> and *The Dendrobiums*<sup>3</sup>, morphologically confirming that our samples were indeed *D. catenatum*. We also conducted molecular biological identification: nuclear and plastid markers were subjected to phylogenetic analysis, which suggested that the samples from all three origins were the same species and were sisters to *D. scoriarum*, confirming at the molecular level that our samples were *D. catenatum* (Supplementary Figure 24). The plants from Guangnan were used as material for genome sequencing.

### Supplementary Note 2. Chromosome preparation

The newly growing root tips were excised and treated with 2 mM 8-hydroxyquinoline for 3 h at 15 °C. The root tips were then fixed in freshly prepared Carnoy's solution (3:1 (v/v) 95 % ethanol/glacial acetic acid) and stored at -20 °C. The fixed material was washed with distilled water and digested with an enzyme mixture containing 1% pectinase solution (Sigma), 1% pectolyase Y23 and 1% Cellulase RS (Yakult) in 10mM citrate buffer (40 mM citric acid, 60 mM tri-sodium citrate, pH 4.5) for 30–40 min. Next, we carefully rinsed fragile meristem with distilled water, squashed in a drop of 45 % acetic acid and removed the coverslip after freezing in

liquid nitrogen. The slides were dried at 42°C and rinsed with Carnoy's solution and 95 % ethanol. Finally, chromosomes were stained with 10 µg/ml propidium iodide (PI) of 15 µl VECTASHIELD® Mounting Media (Vector Laboratories, Burlingame, United States) and chromosome morphology could be observed under the fluorescence microscope (Nikon eclipse 80i). The images of chromosome complements or interphase cells were captured with a CCD camera (Nikon DS Ri1) and then analyzed with Nikon NIS-Elements software (**Supplementary Figure 1**).

### **Supplementary Note 3. Transposable element analysis**

The percentage of genes lacking transposable elements (TEs) within introns was 13.69% for *D. catenatum*, which is lower than for banana (*Musa acuminata*; 65.45%), date palm (*Phoenix dactylifera*; 58.74%), rice (*Oryza sativa*; 52.21%) and *Arabidopsis thaliana* (90.10%). Given that this large proportion of TEs occurs in combination with an extraordinary long average intron length, we hypothesised a correlation between these parameters. A detailed distribution of the TE rate in introns (**Supplementary Figure 5**) also shows an extra peak of approximately 50% in the TE ratio in the introns of *D. catenatum*, which is not present in other species. To explore how the accumulation of TEs affects the length of introns, we conducted a Pearson's correlation analysis on four plant species (**Supplementary Figure 25**). We found that the longer the average intron, the stronger the correlation between intron length and intronic TE length, culminating in an almost complete correlation in *D. catenatum*. Therefore, we conclude that the increased intron length observed in *D. catenatum* is mainly the result of intronic TE insertion. We observed a higher-than-average percentage of transposable elements (TEs) in the genome of *D. catenatum* compared to other plant species. This was shown (**Supplementary Note 4 and Supplementary Table 7**) to cause the overall great intron length in the *D. catenatum* genome.

### **Supplementary Note 4. Gene prediction**

MAKER<sup>5</sup> was used to generate a consensus gene set based on *de novo* prediction,

1   homology annotation with CEGMA<sup>6</sup> and other sequenced monocots, and RNA-seq  
2   gene prediction. These results were integrated into a final set of 28,910 protein-coding  
3   genes for annotation (**Supplementary Table 19**). *D. catenatum* was found to have a  
4   longer average gene length than most other sequenced plants, but similar to that of *P.*  
5   *equestris* (**Supplementary Figure 7 and Table 7**), because both species have a long  
6   average intron length. Therefore, this feature might be a unique characteristic of  
7   Orchidaceae. We were able to generate functional assignments for 83.15% of the *D.*  
8   *catenatum* genes from at least one of the public protein databases (**Supplementary**  
9   **Table 19**).

10

#### 11   **Supplementary Note 5. Gene family annotation**

12   Gene family clustering was performed based on the set of 28,910 predicted genes  
13   from *D. catenatum* with the protein-coding genes of seven other monocots (*P.*  
14   *equestris*, *S. bicolor*, *B. distachyon*, *O. sativa*, *M. acuminata* and *Ph. dactylifera*),  
15   three dicots (*Po. trichocarpa*, *A. thaliana* and *V. vinifera*) and the outgroup *Am.*  
16   *trichopoda*. This analysis yielded 13,530 gene families in *D. catenatum*, containing  
17   21,857 predicted genes (75.6% of the total genes identified; **Supplementary Figure**  
18   **20 and Supplementary Table 15**). A four-way comparison of Orchidaceae, dicots,  
19   Poaceae, *M. acuminata* and *Ph. dactylifera* (**Supplementary Figure 21**) uncovered  
20   10,052 gene families to be shared by all species, with 2,859 gene families unique to  
21   Orchidaceae, which is fewer than for the dicots (3,884) or Poaceae (5,668). Two five-  
22   way comparisons were also performed to show the number of species-specific gene  
23   families, and also uncovered more gene families in Poaceae (**Supplementary Figure**  
24   **26**).

25   For the *D. catenatum*-specific gene families, we conducted a GO/KEGG  
26   enrichment analysis and found enrichment of the KEGG pathways ‘Tyrosine  
27   metabolism’, ‘Fatty acid metabolism’ and ‘Glycolysis/Gluconeogenesis’  
28   (**Supplementary Table 21**). On further analysis of the Orchidaceae- and monocot-  
29   specific gene families, Orchidaceae-specific gene families were found to be enriched

for GO terms associated with transcription (**Supplementary Table 22**) and the pathways ‘GPI-anchor biosynthesis’ (**Supplementary Table 23**), whereas the monocot-specific gene families were enriched for the GO terms ‘ADP binding,’ ‘defence response’, ‘solute:hydrogen antiporter activity’, ‘two-component response regulator activity’ and the KEGG pathways ‘RNA polymerase’, ‘Pyrimidine metabolism’, ‘Purine metabolism’, ‘Flavonoid biosynthesis’ and ‘Stilbenoid, diarylheptanoid and gingerol biosynthesis’ (**Supplementary Tables 24 and 25**).

We constructed a phylogenetic tree based on a concatenated sequence alignment of 677 single-copy gene families from *D. catenatum* and 11 other plant species by using PhyML<sup>7</sup> software with Maximum Likelihood method (**Figure 1**).

#### **Supplementary Note 6. Collinearity identification and WGD time estimation**

A total of 14,289 *D. catenatum* genes reside on scaffolds of fewer than 20 genes, of which approximately 4,982 genes are located on scaffolds with fewer than five genes; all are of limited use for the intragenome detection of collinearity. Therefore, we believe the collinearity of the genome is likely to constitute a substantial underestimate.

For every paralogue in the *D. catenatum* genome, we filtered out all of the tandem gene pairs and then calculated the  $K_s$  value for each pair. A correction was performed using the method described by Maere et al.<sup>9</sup>. Divergence time estimates were based on histogram peak  $K_s$  values of the youngest pairs and a molecular clock of  $\lambda=6.5 \times 10^{-9}$  synonymous substitutions per site per year<sup>8</sup>.

#### **Supplementary Note 7. Proposed biosynthetic pathway of GM and GGM in *D. catenatum* stem**

The biosynthetic pathway we proposed for GM and GGM was modified from the one proposed for *Amorphophallus konjac*<sup>10</sup>. GM or GGM biosynthesis is generated from sucrose produced by photosynthesis in the *D. catenatum* leaf and/or stem. The enzymes indicated in red are highly expressed in the stems (**Figure 3**,

1 **Supplementary Figure 16 and 19**). The topology of *Csl* proteins is unknown. The  
 2 *CslA* and *CslD* enzymes may contain multiple transmembrane domains  
 3 (**Supplementary Table 16**) and probably have catalytic sites (indicated in pink) in  
 4 either cytosolic or the luminal side of Golgi membrane. In case the catalytic site is  
 5 located in the Golgi apparatus, NDP-sugar transporters are necessary for the  
 6 transportation of NDP-sugars from the cytoplasm to the Golgi apparatus<sup>11</sup>. There are  
 7 19 putative NDP-sugar transporter genes in the *D. catenatum* genome  
 8 (**Supplementary Table 16**). The Glc and Man in GGM backbone can be modified  
 9 with galactose (Gal) side chains in  $\alpha$ -1,6-linkage<sup>12</sup>. In addition, GGM also contains  
 10 side branching points at the C6 position of Glc<sup>13,14</sup> or Man<sup>15</sup> by  $\beta$ -1,6-linkage.  
 11 However, the glycosyltransferase (GT) family genes responsible for this branching  
 12 formation are still unknown. Furthermore, the O-2 positions of some Man of GGM  
 13 are modified with acetyl groups<sup>14</sup> and Reduced Wall Acetylation (RWA) gene acts as a  
 14 probable acetyl-CoA transporter<sup>16</sup>. Three putative RWA genes were found in the *D.*  
 15 *catenatum* genome (**Supplementary Table 16**). This acetylation has been proved to  
 16 be essential for GGM medicinal activity in some *Dendrobium* species<sup>17</sup>. Mannan  
 17 synthesis-related (MSR) proteins have a single transmembrane domain and have been  
 18 demonstrated to be localized in the Golgi apparatus. It is involved in GM or mannan  
 19 synthesis in an unknown manner<sup>12</sup>. A previous study hypothesized that MSR may be  
 20 involved in the synthesis of primer of GM, which is important for the initiation of GM  
 21 synthesis such as xylans, a hemicellulosic polysaccharide<sup>16, 18</sup>. One *MSR* candidate  
 22 gene, highly expressed in stem, was isolated from the *D. catenatum* genome  
 23 (**Supplementary Table 16**). It would be interesting to know whether this *MSR* gene  
 24 also plays an important role in the biosynthesis of GM or GGM.  
 25

## 1    **Supplementary Figures**

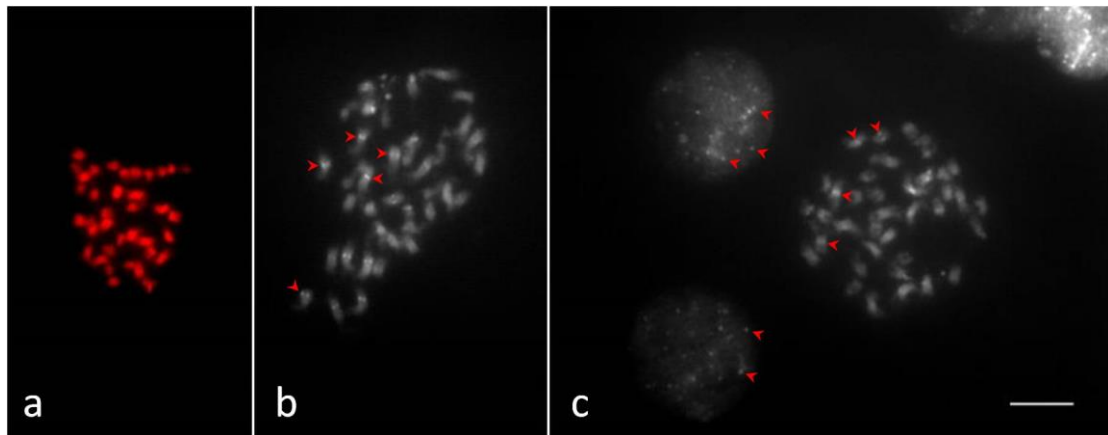

2

3

4    **Supplementary Figure 1. Propidium iodide (PI) stained chromosomes at**  
5    **metaphase, prometaphase and interphase stages.** A metaphase complement of  $2n =$   
6    38 chromosomes (red pseudo-colored) with sizes of approximately  $2\ \mu\text{m}$  (a). Small  
7    dots (indicated only some by arrowheads) consistently showed constitutive  
8    heterochromatin at prometaphase chromosomes (b and c) and interphase nuclei (c).  
9    Bar represents  $10\ \mu\text{m}$ .

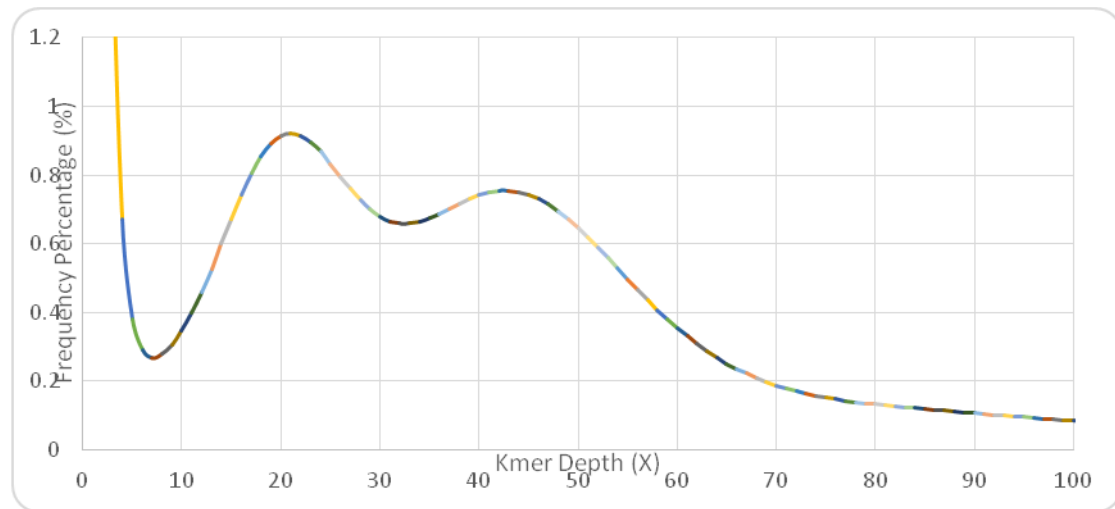

1

2 **Supplementary Figure 2. Estimation of genome size based on 17-mer**

3 **distribution.** The first peak appearing at 21 is caused by the high amount of  
 4 heterozygosity. Genome size can be estimated using the position of the second peak:  
 5 the total number of K-mers is 46,613,336,744, and the position of the second peak is  
 6 at 42; therefore, the genome size of *D. catenatum* is estimated to be 1,109,841,351  
 7 (=46,613,336,744/42).

8

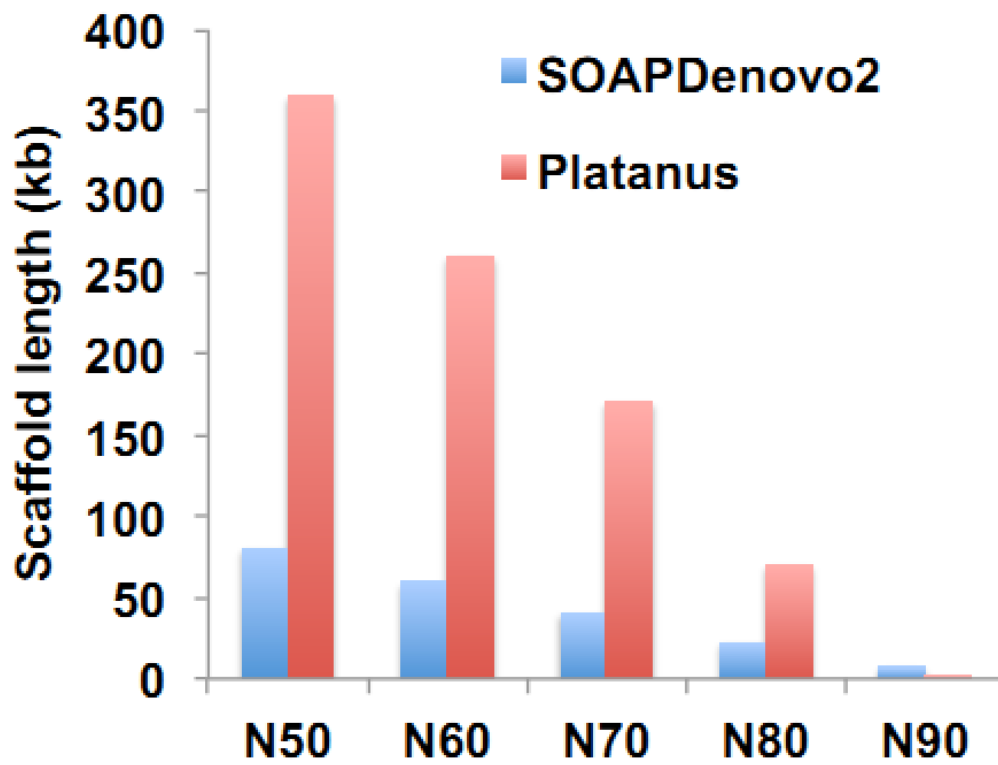

2    **Supplementary Figure 3. Comparison of the lengths of scaffolds assembled using**  
3    **the SOAPdenovo2 and Platanus software programs, respectively**

4

1

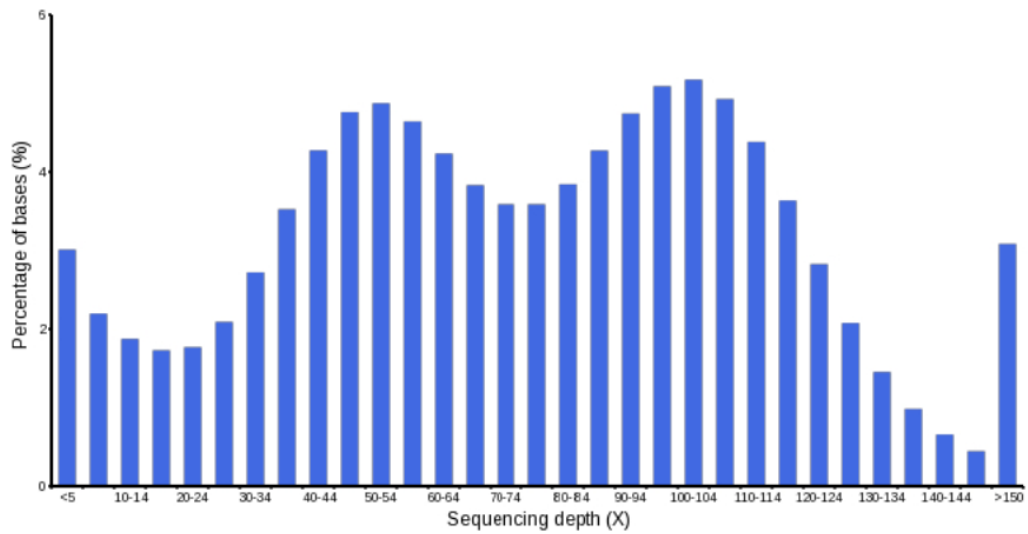

2 **Supplementary Figure 4. Distribution of the sequencing depth of the assembled**  
3 **genome of *D. catenatum*.** Mapping all of the paired-end reads to the assembly reveals  
4 that 97% of the sequence has a coverage depth greater than five.

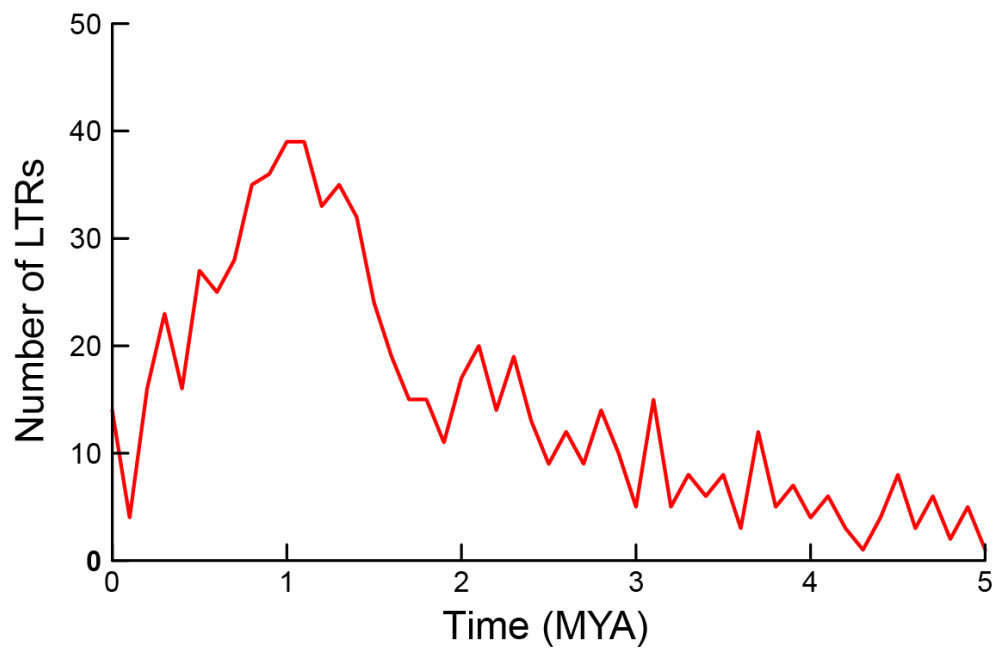

1 **Supplementary Figure 5. Distribution of divergence times for the complete long**  
2 **terminal repeats (LTRs) in *D. catenatum*.** The results indicate that a burst of LTR  
3 activity occurred during the last five million years. MYA, million years ago.  
4

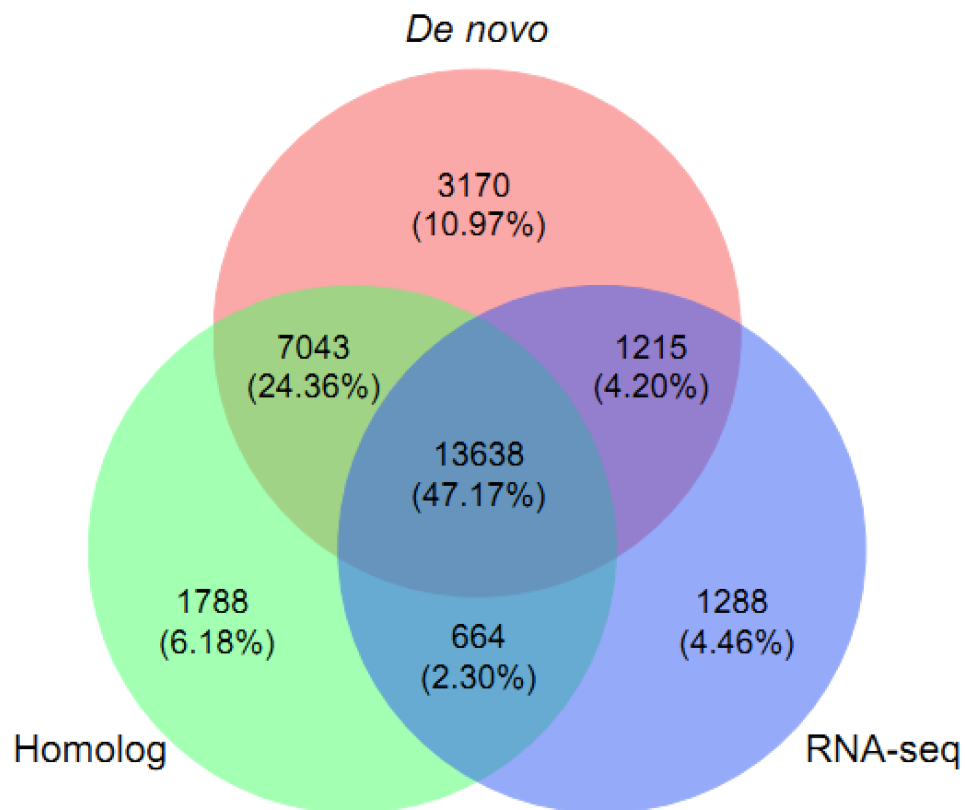

**Supplementary Figure 6. Gene models were supported by evidence from *de novo* prediction, protein-based homology searches and RNA-seq data.** The results indicate that 22,394 (74.9%) of 28,910 annotated protein-coding genes are supported by transcriptome data.

1

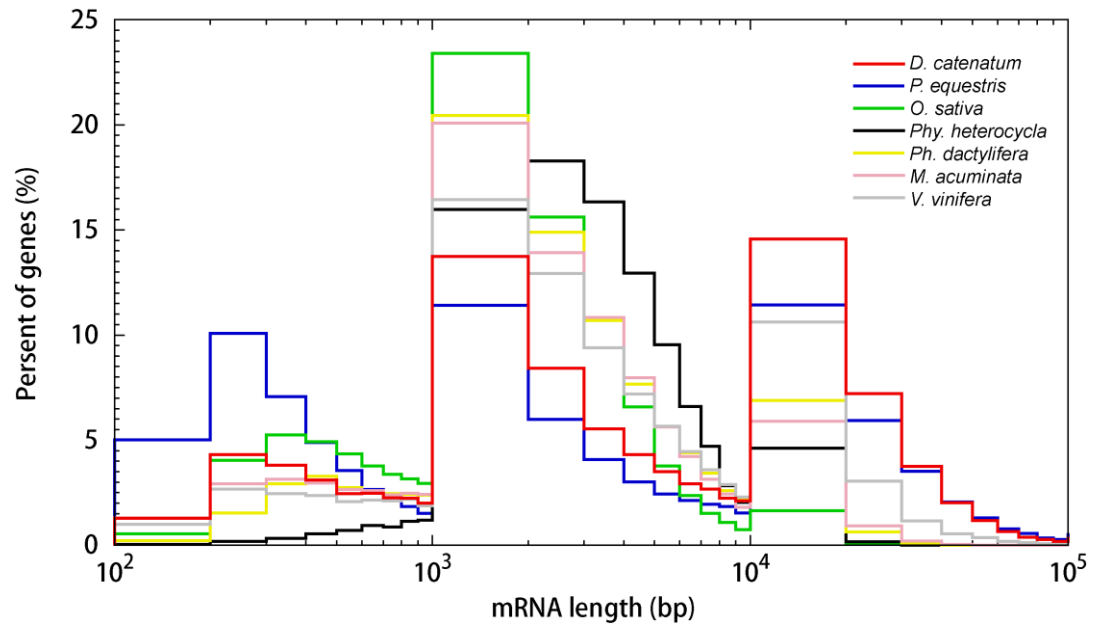

2

3 **Supplementary Figure 7. Gene length distribution for seven plant species. *D.***

4 *catenatum* has, on average, longer genes than most other sequenced plant species.

5 See text for details.

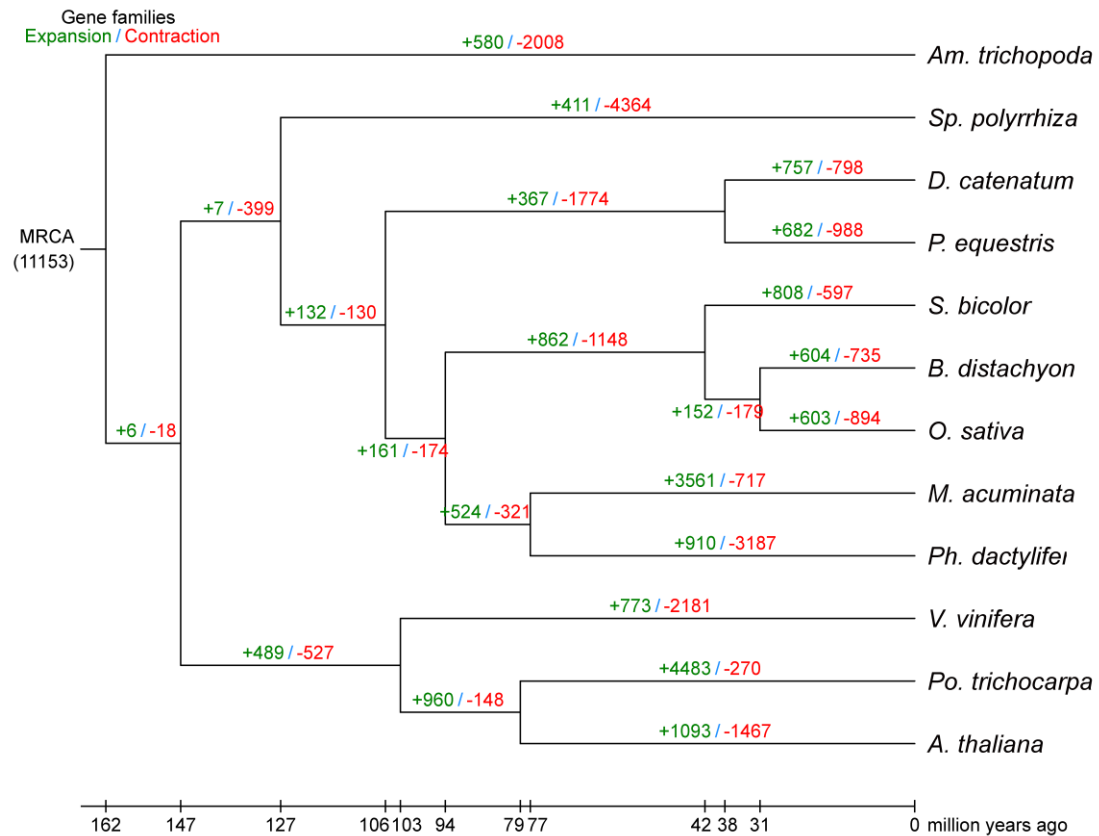

**Supplementary Figure 8. Gene family expansion and contraction in different flowering plant lineages, mapped on the phylogenetic tree of Figure 1.** Expanded gene families are shown in green, while contracted gene families are shown in red. MRCA, most recent common ancestor.

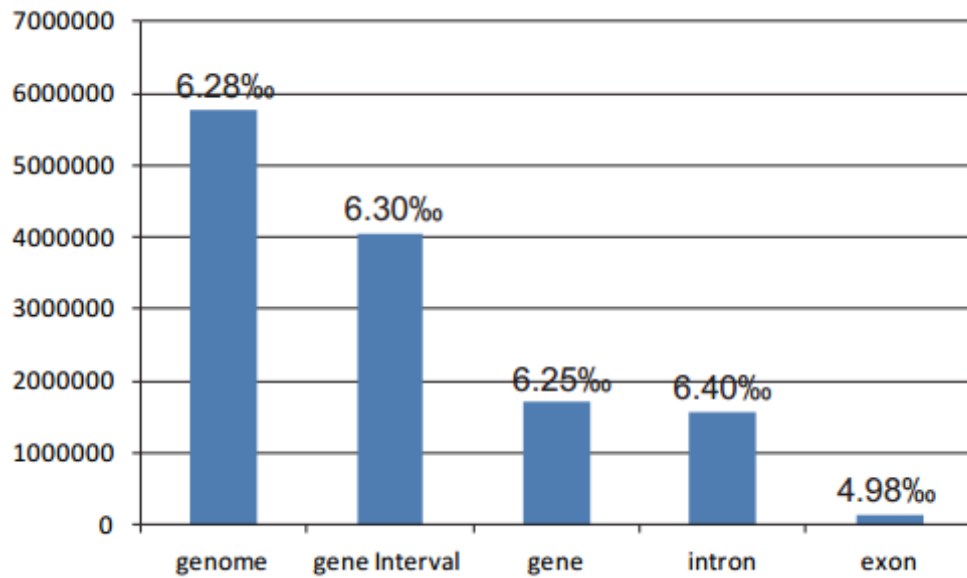

**Supplementary Figure 9. Distribution of single nucleotide polymorphisms (SNPs) in the *D. catenatum* genome.** The heterozygous SNP rate for the whole genome was estimated at  $6.28 \times 10^{-3}$ , whereas the SNP rate in exons was estimated to be  $4.98 \times 10^{-3}$ . Thousandths at each bar indicate the SNP ratio in each region.

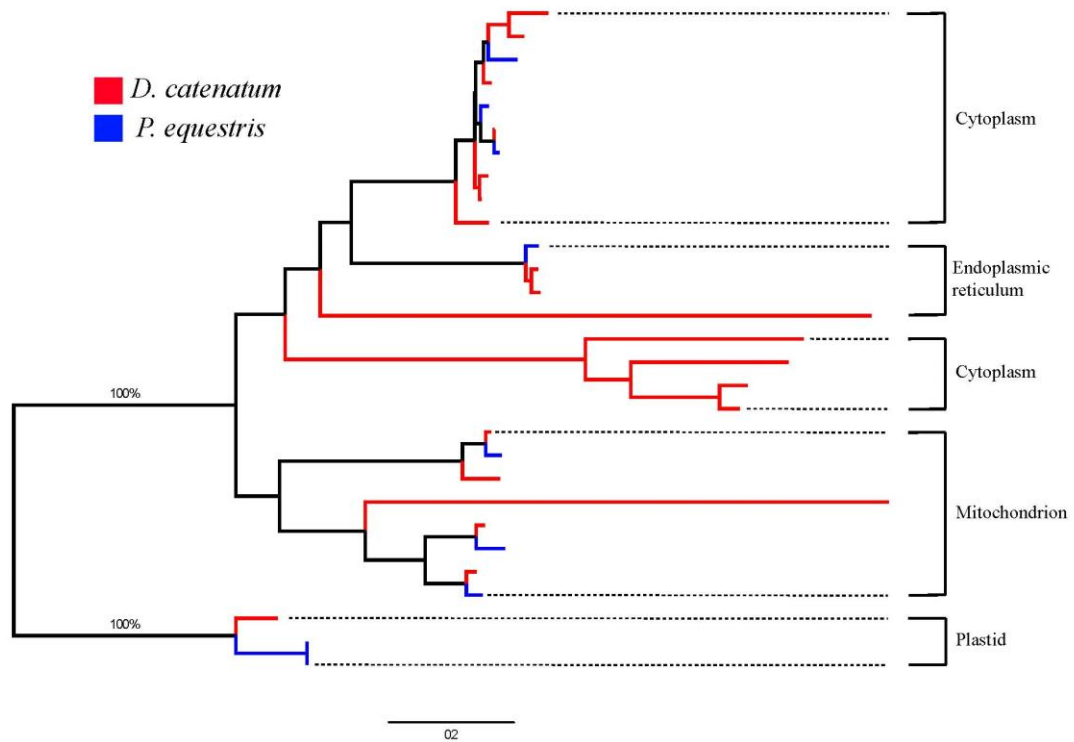

1  
2 **Supplementary Figure 10. Evolution of selected heat shock protein (*Hsp*) gene**  
3 **families.** Hsp70 gene products localizing in the cytoplasm have more members in *D.*  
4 *catenatum* than in *P. equestris* (11 vs. 3). Red branches represented Hsp genes of *D.*  
5 *catenatum* while blue branches represent *P. equestris*.

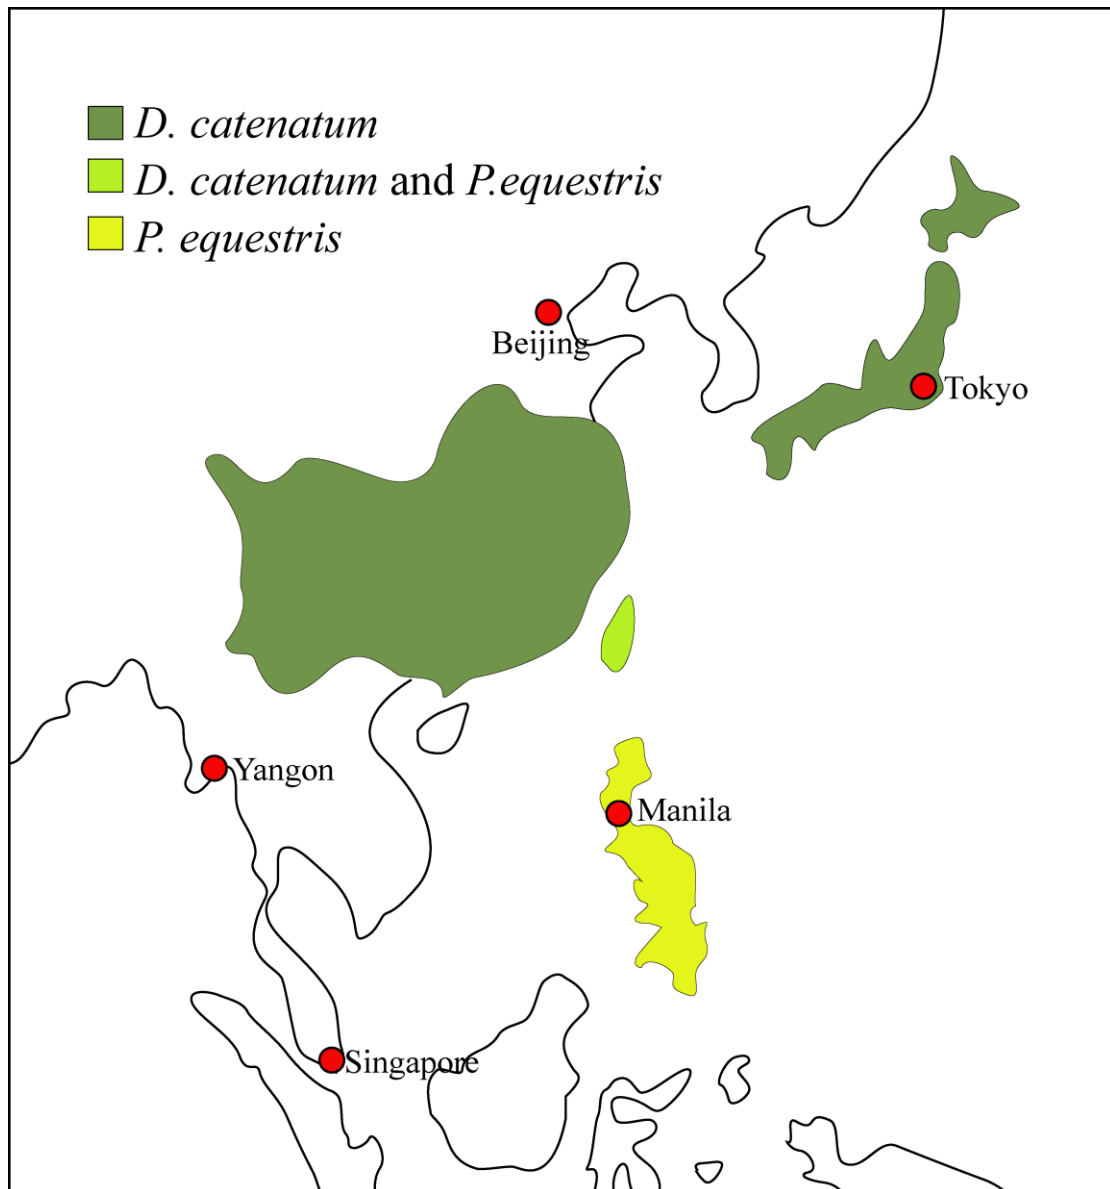

1  
2

3 **Supplementary Figure 11. Comparison of distributions of *D. catenatum* and *P.***  
 4 ***equestris*** (modified from Cribb<sup>19</sup> and drawn by Li-Jun Chen using Photoshop 8.0.1<sup>20</sup>).  
 5 *D. catenatum* is found in subtropical and temperate regions and has a much wider  
 6 distribution than *P. equestris*.

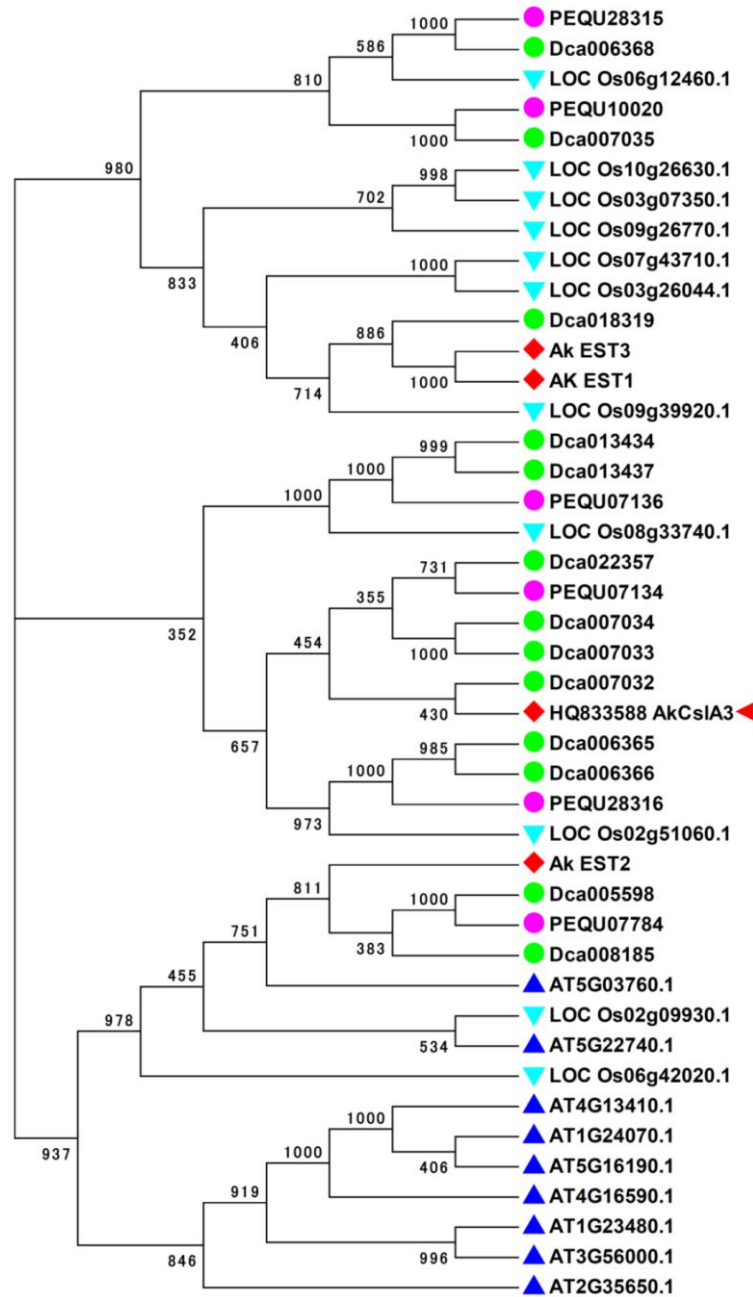

**Supplementary Figure 12. Phylogenetic tree of *CsIA*.** The AkCslA3 gene with proved glucomannan synthase activity is indicated by a red arrowhead. The light and deep blue triangles indicate rice (labeled LOC) and *A. thaliana* (AT), respectively. The green and pink dots represent *D. catenatum* (Dca) and *P. equestris* (PEQU), respectively. All sequences used here are longer than 200 amino acids. The konjac EST sequences are provided in **Supplementary Table 26**. Bootstrap values are shown on each branch.

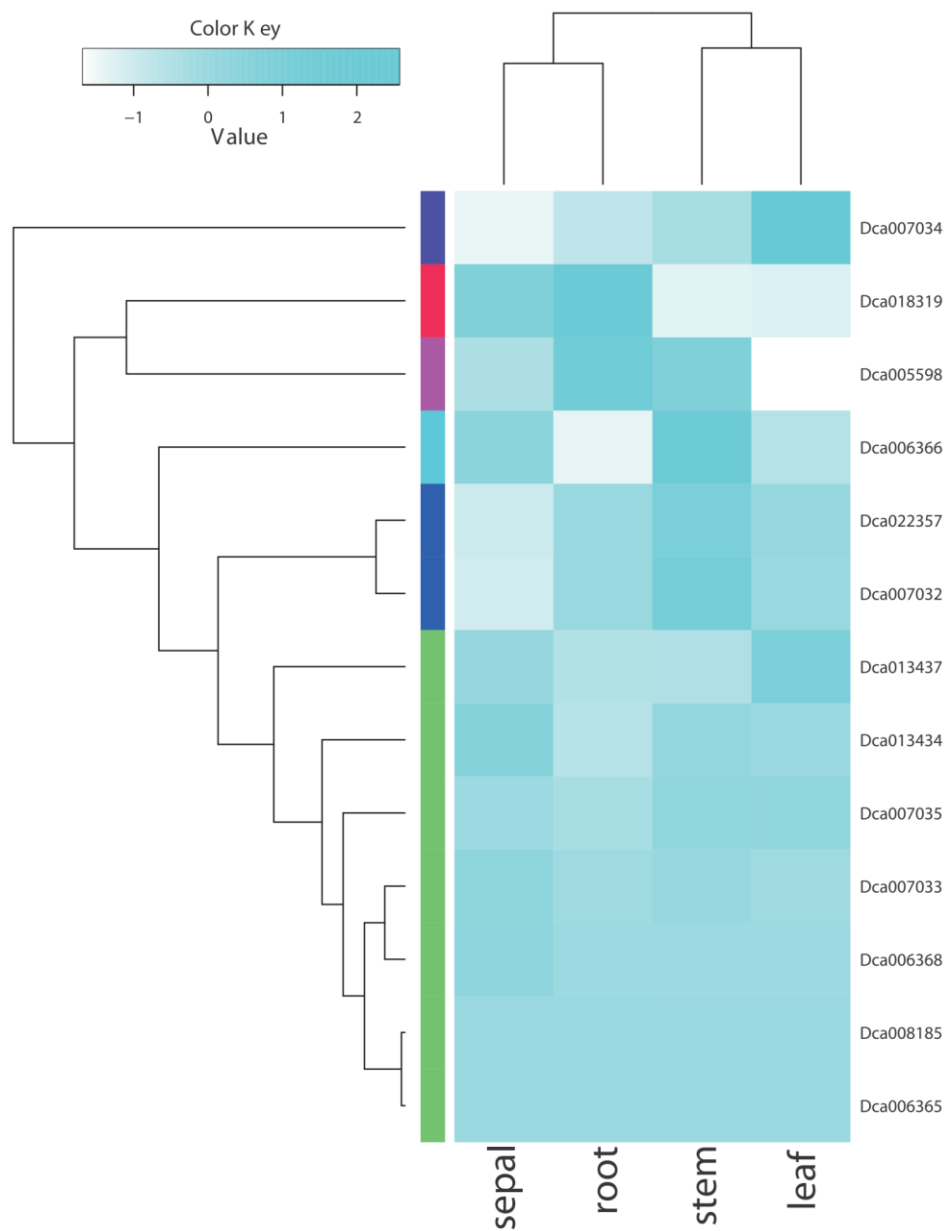

2 **Supplementary Figure 13. Heat map showing the expression of *CsIA* genes in**  
 3 **four tissues of *D. catenatum*. Genes shown in dark cyan are highly expressed, genes**  
 4 **shown in light cyan are lowly expressed.**

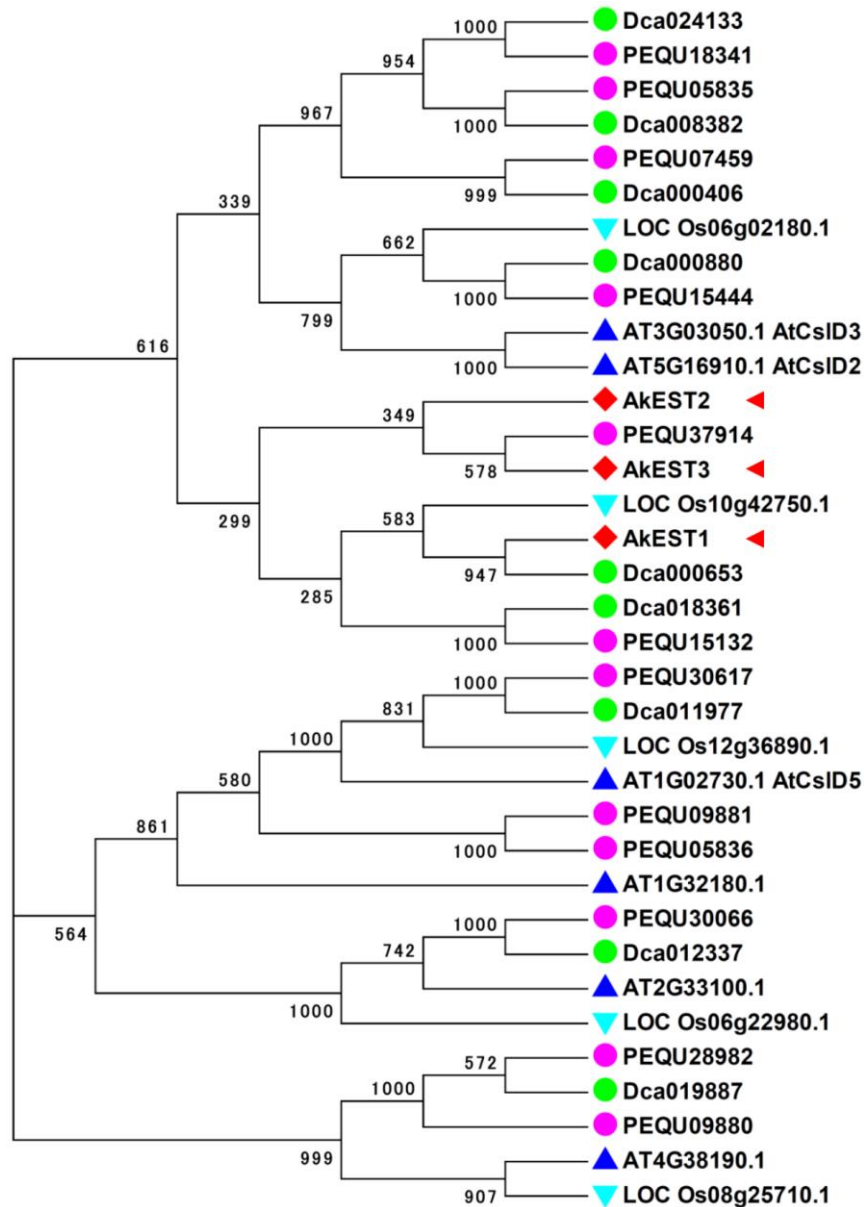

**Supplementary Figure 14. The phylogenetic tree of *CsID*.** The konjac putative *CsID* genes (EST clones) were included to search orthologues in the *D. catenatum* genome. The konjac sequences were labeled by red arrowheads. The light and deep blue triangles indicate rice (labeled LOC) and *A. thaliana* (AT), respectively. The green and pink dots represent *D. catenatum* (Dca) and *P. equestris* (PEQU). The sequences used here are longer than 150 amino acids. The konjac EST sequences were provided in **Supplementary Table 26**. Bootstrap values were shown on each branch.

1

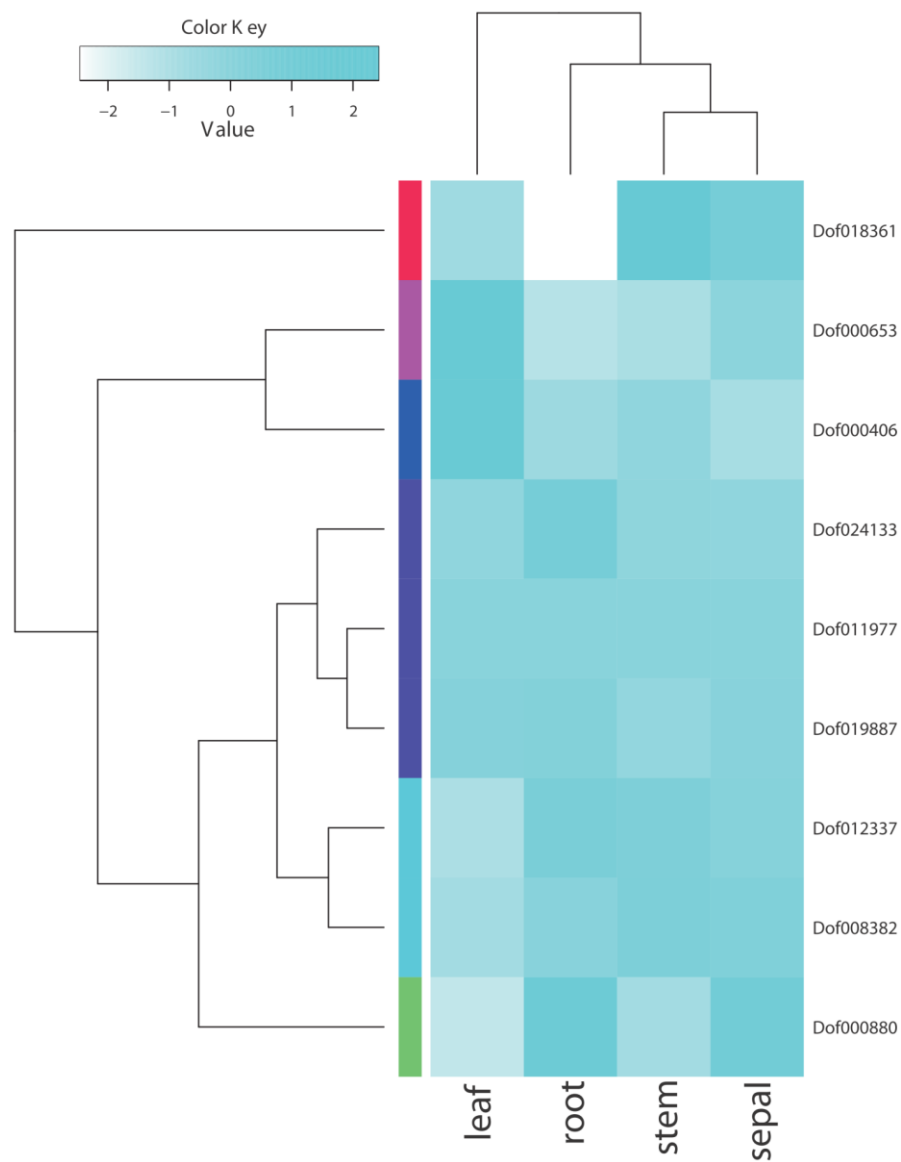

2

3 **Supplementary Figure 15. Heat map showing the transcriptome expression of**

4 ***CsID* genes in four tissues of *D. catenatum*.** Genes shown in dark cyan are high-

5 expressed, in contrast, light cyan represent that these genes are low-expressed.

6

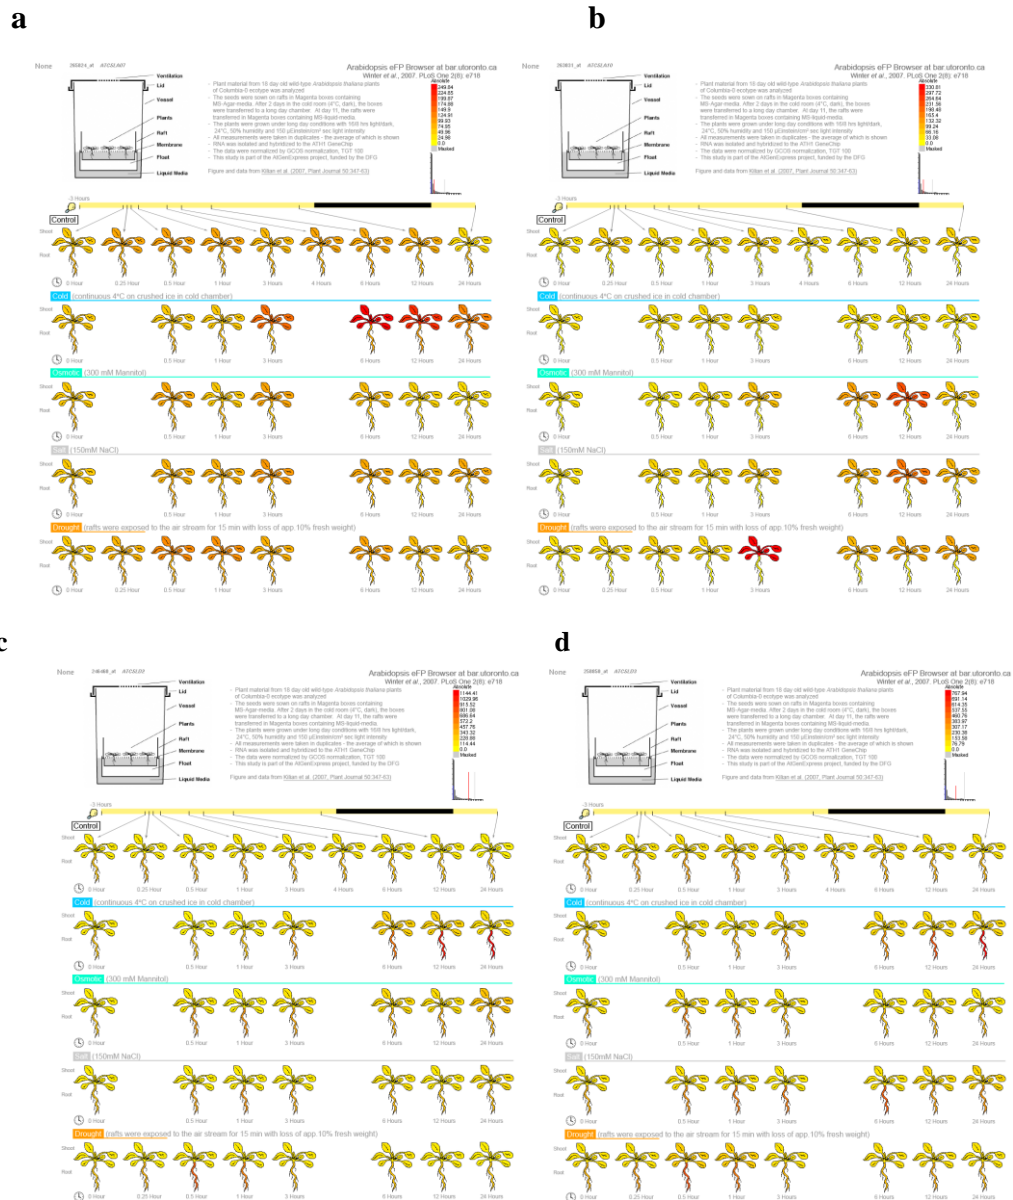

**Supplementary Figure 16. Expression levels of Arabidopsis *CsIA* and *CsID* genes in response to abiotic stresses.** The microarray data were from the study performed by Kilian et al.<sup>21</sup>. The expression levels of *CsIA7* (a), *CsIA10* (b), *CsID2* (c) and *CsID3* (d) under cold, osmotic, salt and drought stresses were retrieved from the Arabidopsis eFP Browser<sup>22</sup> (<http://bar.utoronto.ca/efp/cgi-bin/efpWeb.cgi>). The color scale bar in each image shows the absolute expression levels for the individual gene. (We acknowledge the permission of Professor Nicholas Provart to use the images.)

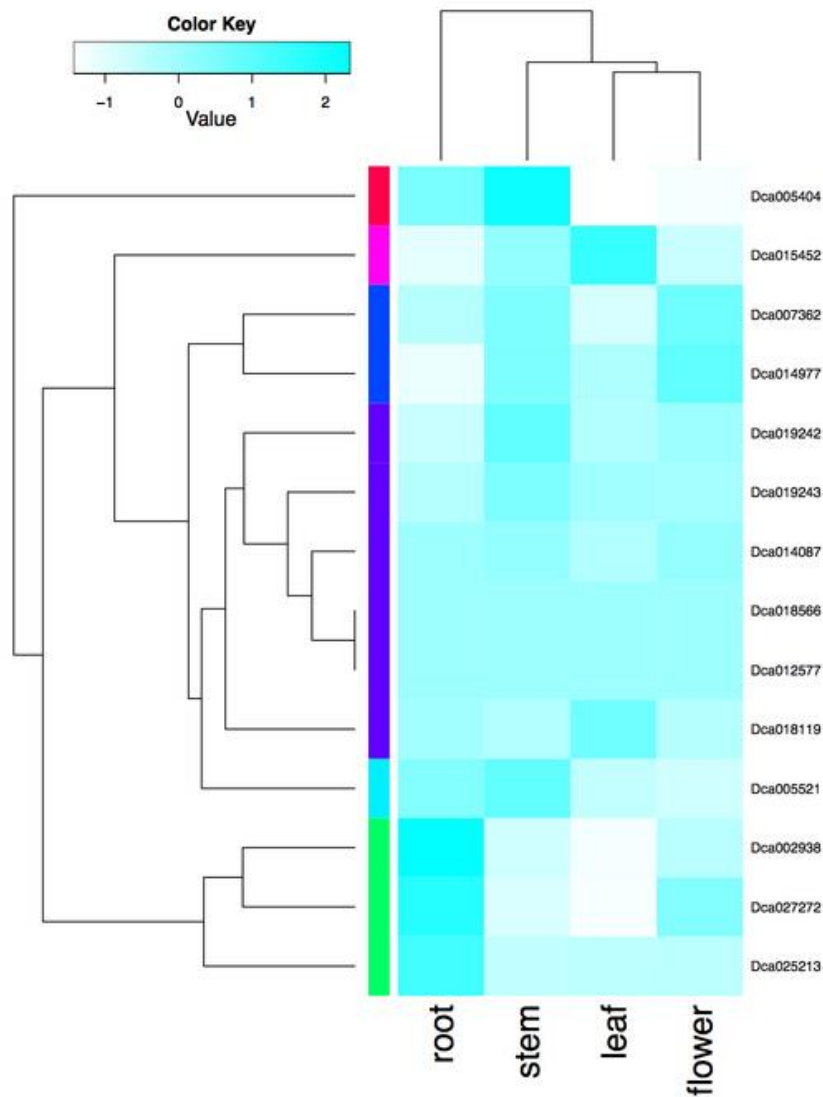

1  
2

3 **Supplementary Figure 17. Heat map showing the transcriptome expression of**  
 4 ***GH5* genes in four tissues of *D. catenatum*.** Genes shown in dark cyan are high-  
 5 expressed, in contrast, light cyan represent that these genes are low-expressed.  
 6

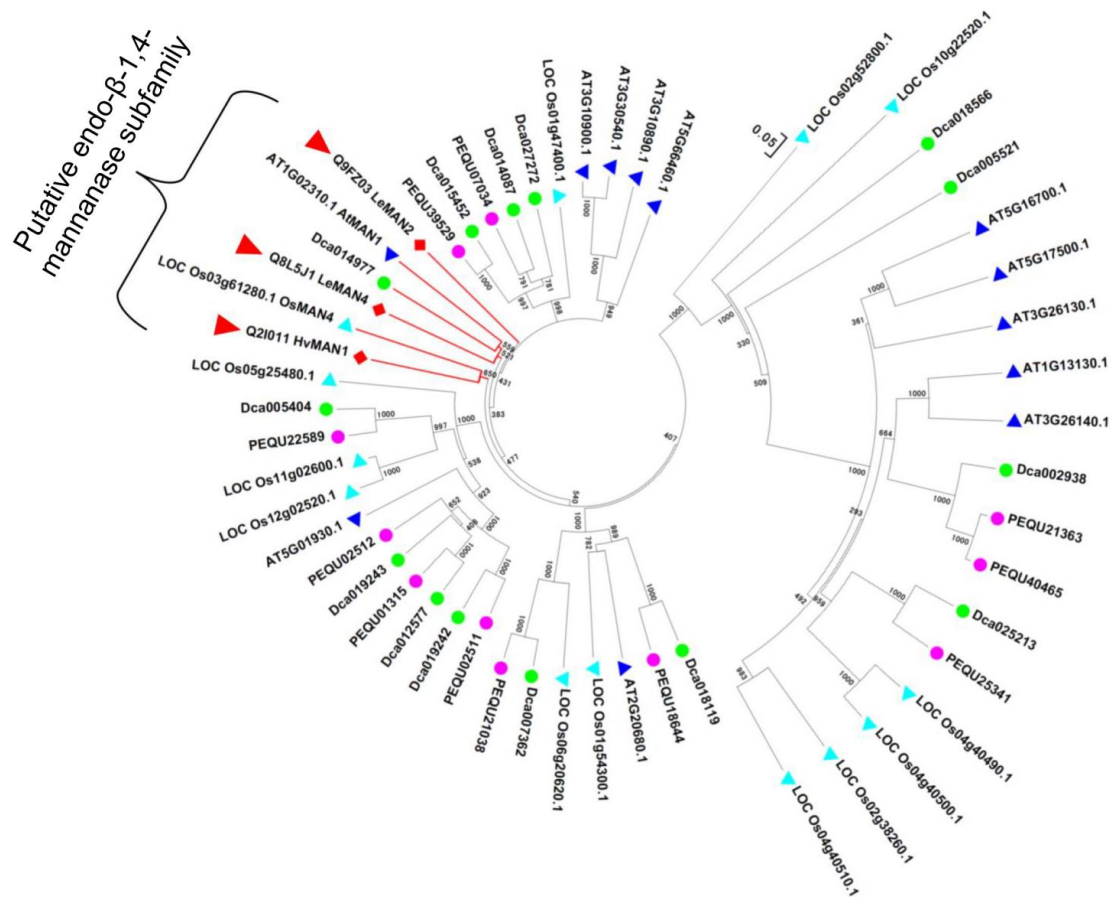

**Supplementary Figure 18. The phylogenetic tree of GH5 gene families.** The GH5 genes of barley (*HvMAN1*) and tomato (*LeMAN2* and *LeMAN4*) with proved mannanase activities were included and labeled by red arrowhead. The subclade containing these mannanase genes was indicated by red color. The light and deep blue triangles indicate rice (labeled LOC) and *A. thaliana* (AT), respectively. The green and pink dots represent *D. catenatum* (Dca) and *P. equestris* (PEQU). The sequences used here are longer than 200 amino acids. Bootstrap values were shown on each branch.

**a**

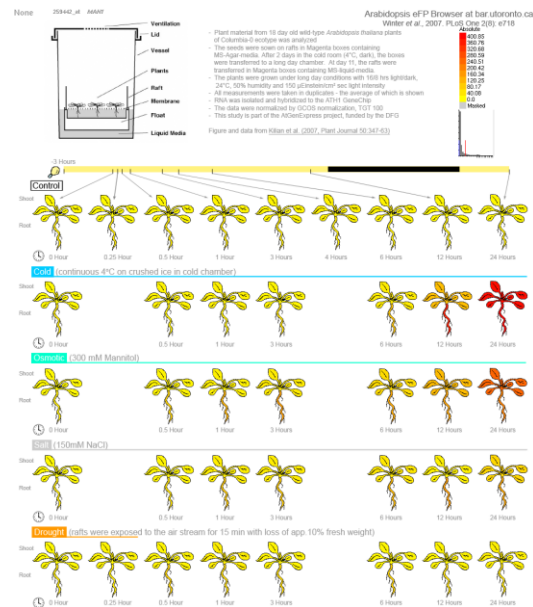

**b**

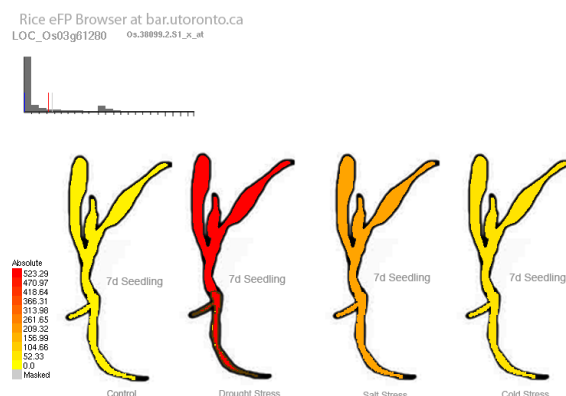

**Supplementary Figure 19. Expression levels of Arabidopsis and rice *GH5* genes in response to abiotic stresses.** The microarray data of Arabidopsis and rice were obtained from Kilian *et al.*<sup>21</sup> and Jain *et al.*<sup>23</sup>, respectively. Expression levels of AtMAN1 (a) and Os03g61280 (b) under cold, osmotic, salt and drought stresses were retrieved from the Arabidopsis eFP Browser<sup>22</sup> (<http://bar.utoronto.ca/efp/cgi-bin/efpWeb.cgi>) and Rice eFP Browser (<http://bar.utoronto.ca/efprice/cgi-bin/efpWeb.cgi>). The color scale bar in each image shows the absolute expression level for each individual gene. (We acknowledge the permission of Professor Nicholas Provart to use the images.)

1

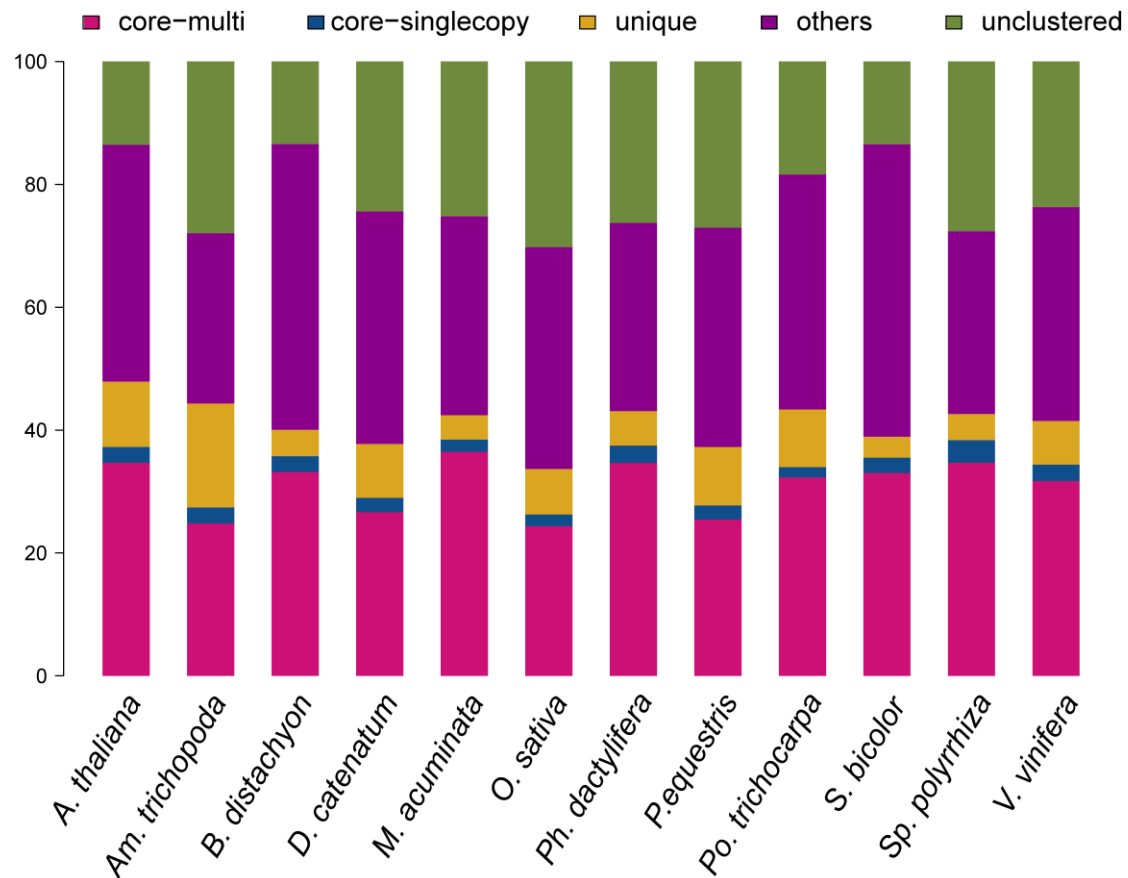

2

### 3 **Supplementary Figure 20. Orthologous genes found in different plant species.**

4 **Core-multi:** genes that have orthologues in all other species and might have  
 5 paralogues in other species. **Core-single copy:** genes that have orthologues in all  
 6 other species and no other paralogues. Thus these genes are single copy in all species.  
 7 **Unique:** Unique gene family for this particular species. **Other orthologues:** genes are  
 8 not included in the other mentioned categories. **Unclustered genes:** genes that are  
 9 unclustered into any family.

10

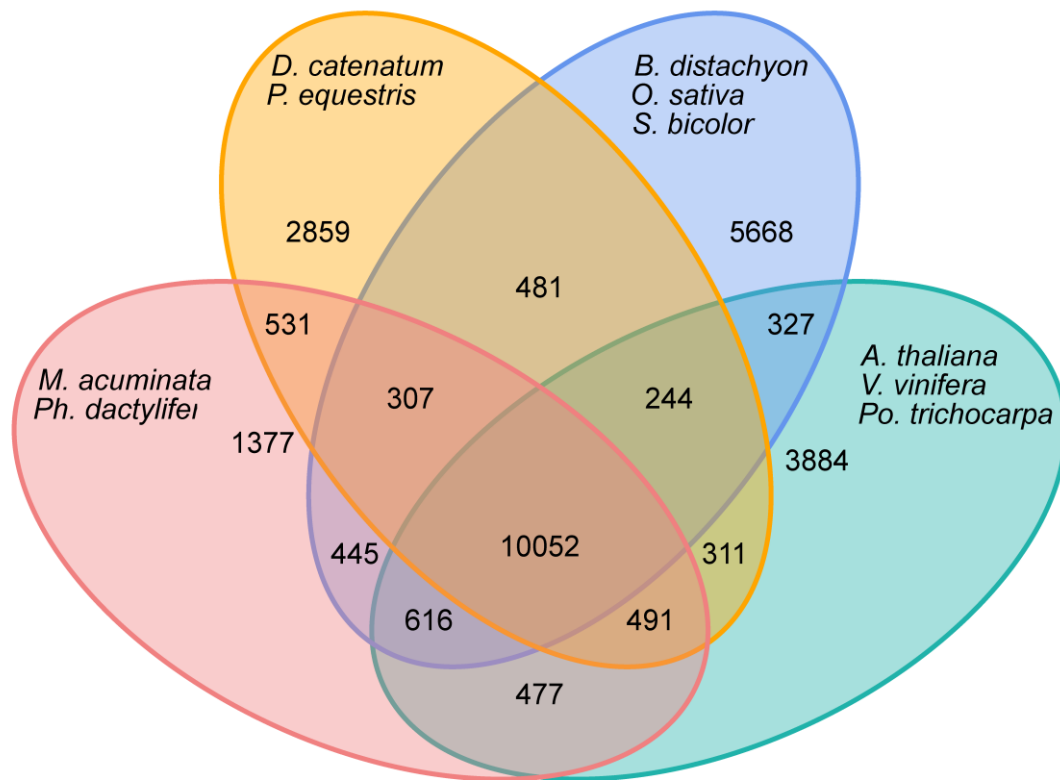

Number of gene families

1

2 **Supplementary Figure 21. Venn diagram showing unique and shared gene**  
3 **families among members of Orchidaceae, dicots and Poaceae, and *M. acuminata***  
4 **and *Ph. dactylifera*.** Numbers represent total shared or unique families. A total of  
5 10,052 families were found in all categories. Comparison of the four categories  
6 revealed that 2,859 gene families were unique to Orchidaceae and 5,668 were unique  
7 to Poaceae. Note: when a gene family was found in only one species of a category, we  
8 considered the family to be specific to that category.

1

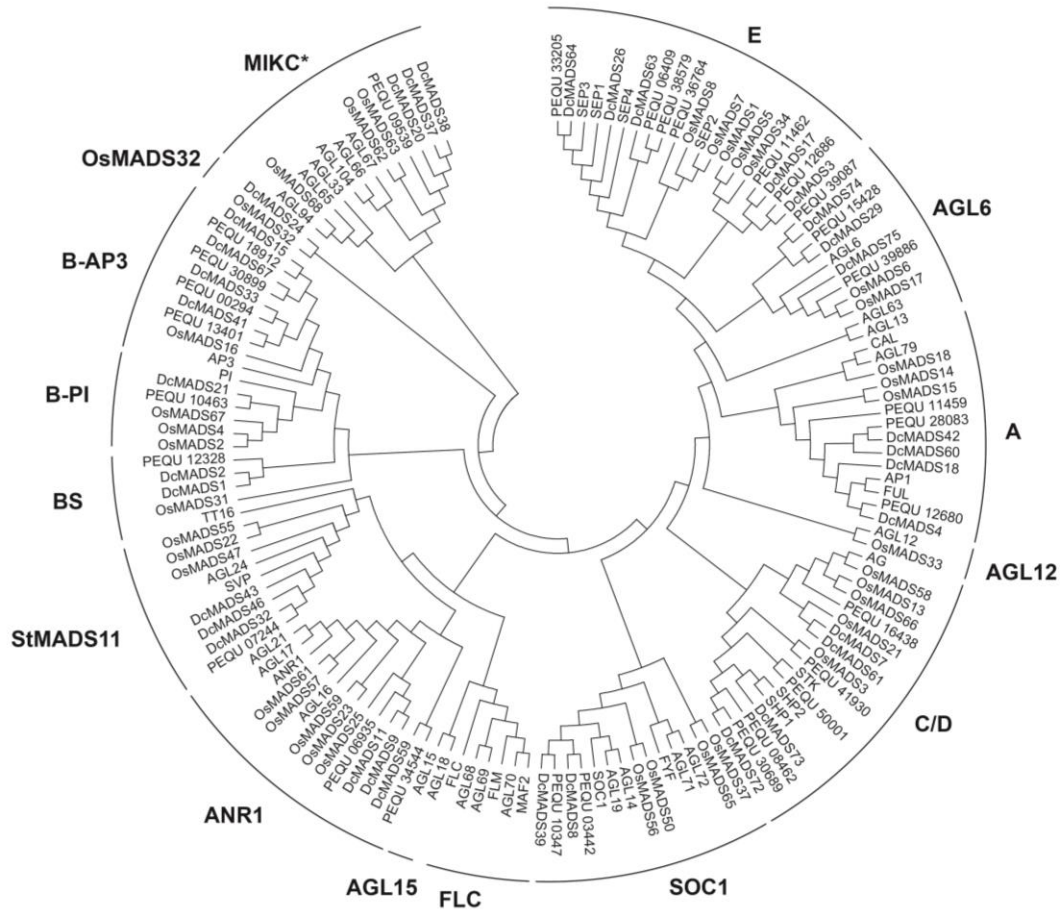

2

3 **Supplementary Figure 22. Phylogenetic tree of Type II MADS-box genes from**4 ***O. sativa* (Os), *A. thaliana* (At), *P. equestris* (PEQU) and *D. catenatum* (Dc).**

5 Phylogenetic analysis indicates that most type II MADS-box genes have duplications

6 in *D. catenatum*, except for those in the B-PI clade. Among these clades, *ANR1*,7 *StMADS11*, *MIKC\**, and *Bs* contain more members than in *P. equestris*. Both *P.*8 *equestris* and *D. catenatum* lost members in the FLC, AGL12, and AGL15 clades.

1

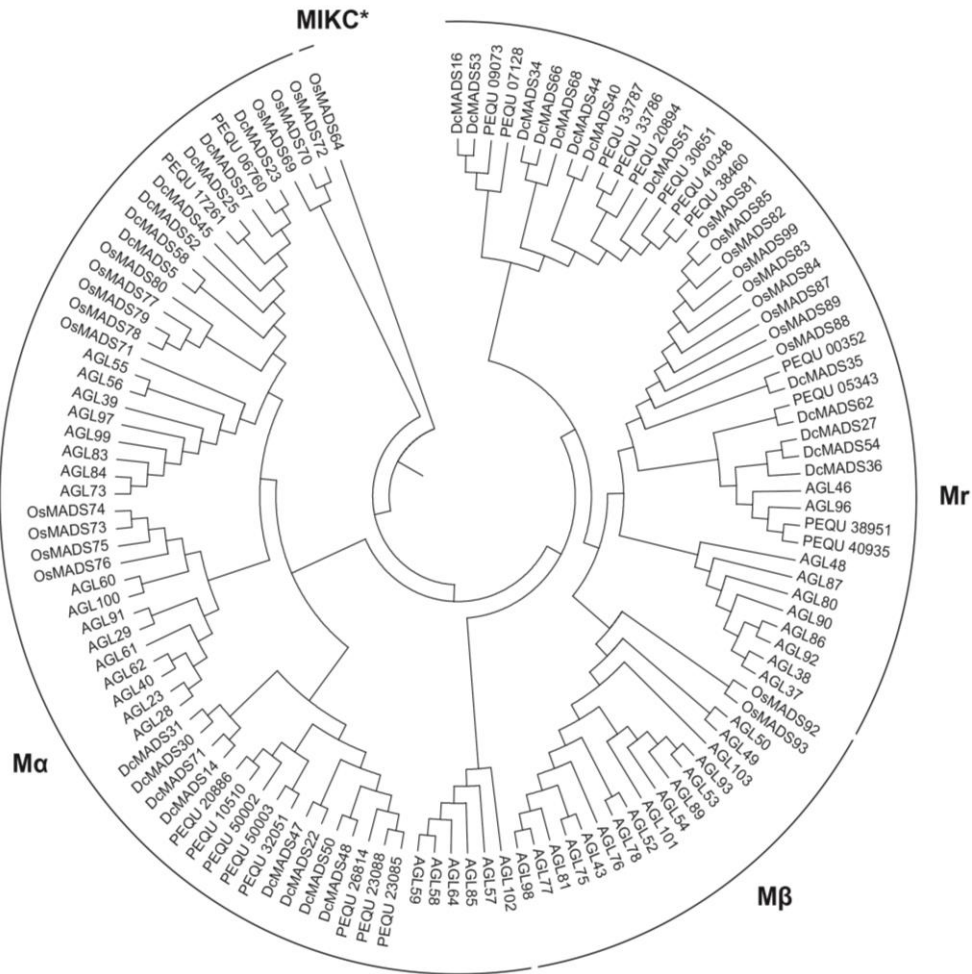

2

3

4 **Supplementary Figure 23. Phylogenetic tree of Type I MADS-box genes from *O.***  
5 ***sativa* (Os), *A. thaliana* (At), *P. equestris* (PEQU) and *D. catenatum* (Dc).** The results  
6 indicate that *ANR1* (with three members), *StMADS11* (three members), *MIKC\** (three  
7 members), and *Bs* (two members) contain more members than in *P. equestris* (two  
8 members in *ANR1* and one member in other three clades, respectively). Both *P.*  
9 *equestris* and *D. catenatum* lost members in the Mβ clades. 28 Type I MADS-box genes  
10 including 15 Mα and 13 Mγ members exist in the *D. catenatum* genome.

11

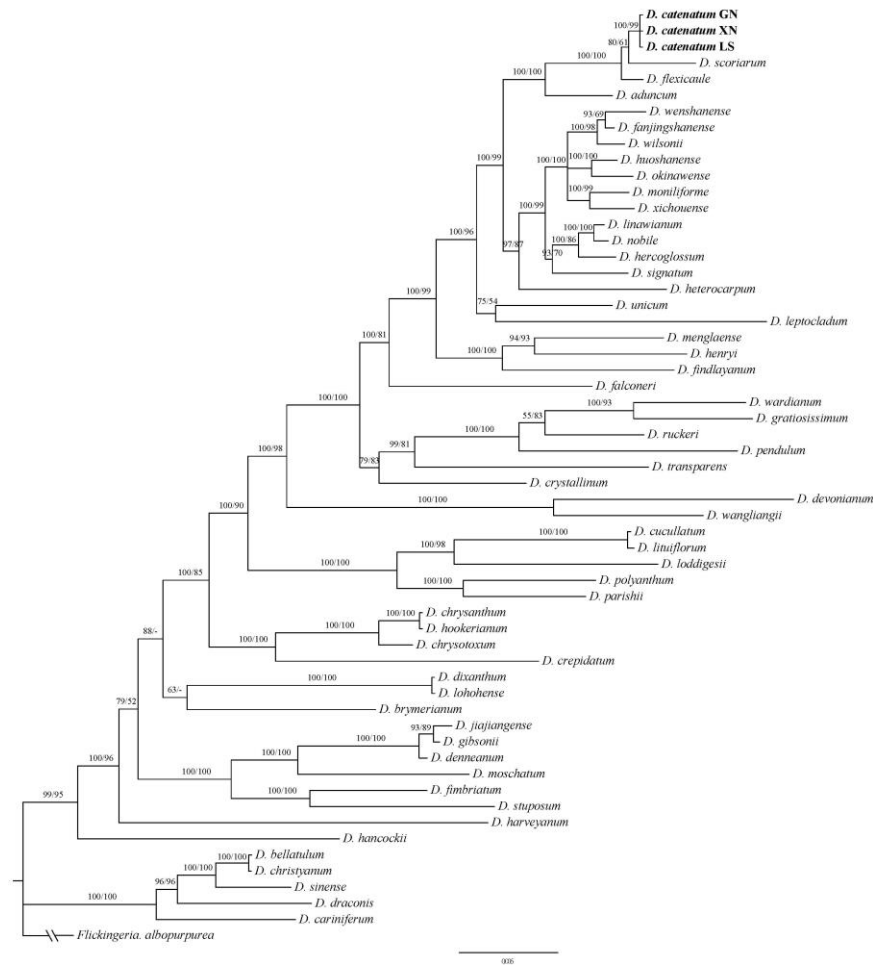

**Supplementary Figure 24. Phylogenetic tree of *Dendrobium* based on nr ITS and plastid DNA.** Phylogenetic analysis indicates that *D. catenatum* is sister to *D. scoriarum* and is an independent species. Numbers at nodes indicate Bayesian posterior probabilities and bootstrap values. “-” indicates that a node receives weak (<50) support in both ML and MP analyses.

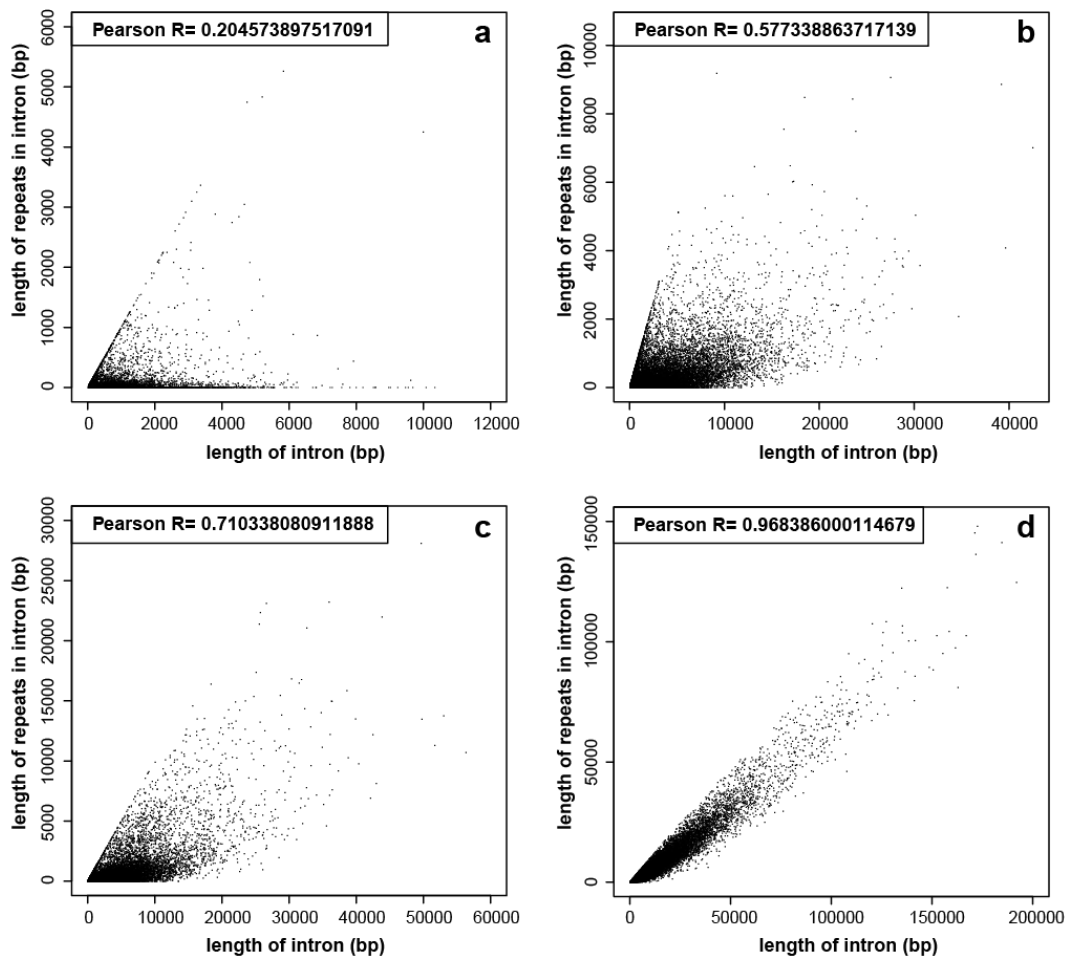

1  
2 **Supplementary Figure 25. Pearson's correlation analysis between intron length**  
3 **and intronic TE length for *Arabidopsis thaliana* (a), *Phoenix dactylifera* (b), *Musa***  
4 ***acuminata* (c), *Dendrobium catenatum* (d).** The results show that the longer the average  
5 intron, the stronger the correlation between intron length and intronic TE length,  
6 leading to an almost complete correlation in *D. catenatum*.

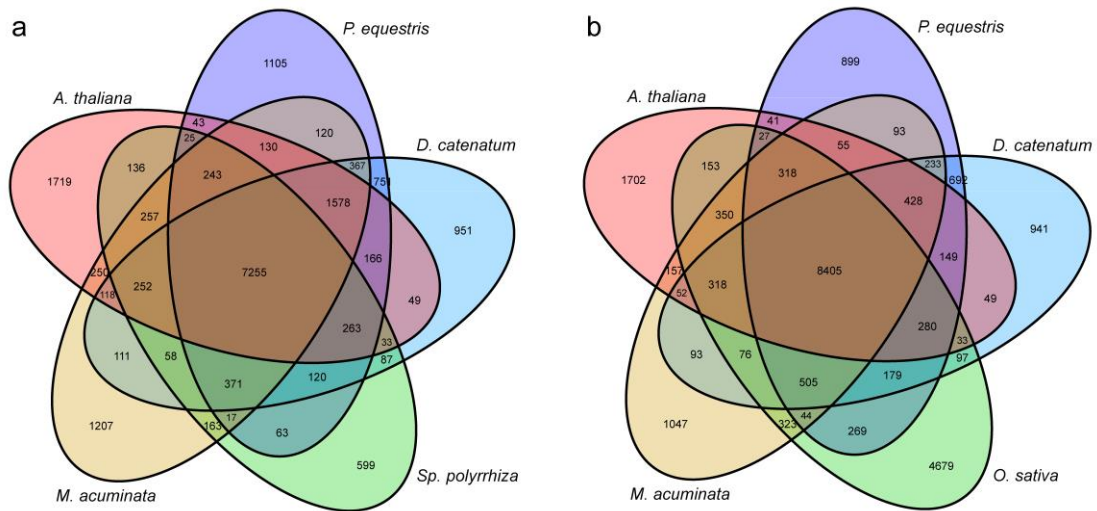

**Supplementary Figure 26. Five-way Venn diagrams showing unique and shared gene families among different plant species.** The results show the number of species-specific gene families. A. *D. catenatum*, *A. thaliana*, *P. equestris*, *M. acuminata* and *Sp. polyrrhiza*. B. *D. catenatum*, *A. thaliana*, *P. equestris*, *M. acuminata* and *O. sativa*.

# 1 **Supplementary Tables**

## 2 **Supplementary Table 1. Summary of data generated for the *D. catenatum*** 3 **genome sequencing with HiSeq 2000<sup>a</sup>**

| Insert size (bp) | Read type | Total data (Gb) | Sequence depth (X) |
|------------------|-----------|-----------------|--------------------|
| 180              | PE 100 bp | 35.95           | 32.68              |
| 500              | PE 90 bp  | 53.72           | 48.84              |
| 800              | PE 100 bp | 25.70           | 23.36              |
| 2000             | MP 100 bp | 30.95           | 28.14              |
| 5000             | MP 100 bp | 23.39           | 21.26              |
| 10,000           | MP 90 bp  | 3.69            | 3.35               |
| 20,000           | MP 90 bp  | 2.26            | 2.06               |
| Total            |           | 175.66          | 159.69             |

4 <sup>a</sup>PE, paired-end; MP, mate-pair.

5

1 **Supplementary Table 2. Summary of the *D. catenatum* genome assembly with**  
2 **Platanus**

|                 | <b>Scaffold</b>    | <b>Number</b> | <b>Contig</b>      | <b>Number</b> |
|-----------------|--------------------|---------------|--------------------|---------------|
|                 | <b>Length (bp)</b> |               | <b>Length (bp)</b> |               |
| Max length      | 2,592,627          |               | 288,536            |               |
| N10             | 1,139,106          | 70            | 87,703             | 847           |
| N20             | 830,336            | 175           | 64,976             | 2,132         |
| N30             | 636,735            | 315           | 51,190             | 3,801         |
| N40             | 497,537            | 494           | 41,112             | 5,886         |
| N50             | 391,462            | 723           | 33,094             | 8,479         |
| N60             | 294,893            | 1,019         | 25,946             | 11,739        |
| N70             | 210,351            | 1,424         | 19,133             | 16,018        |
| N80             | 119,683            | 2,049         | 12,484             | 22,153        |
| N90             | 15,394             | 3,978         | 5,113              | 33,556        |
| Total_length    | 1,008,546,262      |               | 955,235,028        |               |
| number>=500 bp  |                    | 72,903        |                    | 105,732       |
| number>=2000 bp |                    | 14,450        |                    | 45,850        |
| GC ratio        | 0.327              |               | 0.346              |               |

3

4

1 **Supplementary Table 3. CEGMA evaluation for the completeness of the *D.***  
2 ***catenatum* genome assembly**

3

4

|          | Number | Completeness (%) | Total | Average | Orthology (%) |
|----------|--------|------------------|-------|---------|---------------|
| Complete | 231    | 93.15            | 346   | 1.50    | 32.47         |
| Group 1  | 60     | 90.91            | 81    | 1.35    | 21.67         |
| Group 2  | 52     | 92.86            | 78    | 1.50    | 32.69         |
| Group 3  | 58     | 95.08            | 84    | 1.45    | 31.03         |
| Group 4  | 61     | 93.85            | 103   | 1.69    | 44.26         |
| Partial  | 242    | 97.58            | 405   | 1.67    | 39.26         |
| Group 1  | 63     | 95.45            | 88    | 1.40    | 23.81         |
| Group 2  | 54     | 96.43            | 92    | 1.70    | 40.74         |
| Group 3  | 60     | 98.36            | 97    | 1.62    | 36.67         |
| Group 4  | 65     | 100.00           | 128   | 1.97    | 55.38         |

1 **Supplementary Table 4. Evaluation of the *D. catenatum* genome completeness**  
2 **using data set of RNA transcripts**

| Data set  | Number | Total<br>length | Covered by<br>assembly<br>(%) | With >90% sequence<br>in one scaffold |            | With >50% sequence in<br>one scaffold |            |
|-----------|--------|-----------------|-------------------------------|---------------------------------------|------------|---------------------------------------|------------|
|           |        |                 |                               | Number                                | Percentage | Number                                | Percentage |
| >200 bp   | 32,571 | 40,232,920      | 93.43                         | 26,109                                | 80.16      | 29,428                                | 90.35      |
| >500 bp   | 24,054 | 37,553,793      | 94.31                         | 19,655                                | 81.71      | 22,606                                | 93.98      |
| >1,000 bp | 16,529 | 31,953,475      | 94.70                         | 13,438                                | 81.30      | 15,671                                | 94.80      |

3

4

1 **Supplementary Table 5. Statistics for repetitive elements in the *D. catenatum***  
2 **genome<sup>a</sup>**

3

|         | RepBase TEs |        | TE Proteins |        | <i>De novo</i> |        | Combined TEs |        |
|---------|-------------|--------|-------------|--------|----------------|--------|--------------|--------|
|         | Length      | % in   | Length      | % in   | Length         | % in   | Length       | % in   |
|         | (bp)        | Genome | (bp)        | Genome | (bp)           | Genome | (bp)         | Genome |
| DNA     | 14,119,342  | 1.20   | 12,286,880  | 1.05   | 60,007,381     | 5.11   | 71,186,132   | 6.06   |
| LINE    | 33,207,011  | 2.83   | 76,796,121  | 6.53   | 140,798,500    | 11.98  | 169,998,018  | 14.46  |
| SINE    | 80,012      | 0.01   | 0           | 0.00   | 1,392,811      | 0.12   | 1,457,837    | 0.12   |
| LTR     | 105,535,338 | 8.98   | 130,748,856 | 11.12  | 526,202,517    | 44.77  | 537,358,505  | 45.72  |
| Other   | 9,456       | 0.00   | 0           | 0.00   | 0              | 0.00   | 9,456        | 0.00   |
| Unknown | 62,119      | 0.01   | 0           | 0.00   | 29,518,345     | 2.51   | 29,579,608   | 2.52   |
| Total   | 154,558,706 | 13.15  | 219,581,674 | 18.68  | 740,790,020    | 63.02  | 788,949,662  | 67.12  |

4 <sup>a</sup> Repbase transposable elements (TEs): the result of RepeatMasker based on Repbase;  
5 TE proteins: the result of RepeatProteinMask based on Repbase; *De novo*: repeats  
6 found with the *de novo* library; Combined: combined results of the Repbase TEs, TE  
7 proteins and *De novo* repeats.

8

1 **Supplementary Table 6. Gene models supported by differing evidence types**

|                          | <b>&gt;=20% Overlap</b> |                  | <b>&gt;=50% Overlap</b> |                  | <b>&gt;=80% Overlap</b> |                  |
|--------------------------|-------------------------|------------------|-------------------------|------------------|-------------------------|------------------|
|                          | <b>No.</b>              | <b>Ratio (%)</b> | <b>No.</b>              | <b>Ratio (%)</b> | <b>No.</b>              | <b>Ratio (%)</b> |
| <i>De novo</i> (single)* | 2,350                   | 8.13             | 3,616                   | 12.51            | 5,464                   | 18.9             |
| <i>De novo</i> (more)**  | 820                     | 2.84             | 753                     | 2.6              | 712                     | 2.46             |
| Homologue (single)       | 1,273                   | 4.4              | 1,095                   | 3.79             | 969                     | 3.35             |
| Homologue (more)         | 515                     | 1.78             | 598                     | 2.07             | 781                     | 2.7              |
| RNA                      | 1,288                   | 4.46             | 1,562                   | 5.4              | 2,804                   | 9.7              |
| D+H                      | 7,043                   | 24.36            | 5,925                   | 20.49            | 3,879                   | 13.42            |
| D+R                      | 1,215                   | 4.2              | 1,644                   | 5.69             | 2,982                   | 10.31            |
| H+R                      | 664                     | 2.3              | 1,168                   | 4.04             | 2,375                   | 8.22             |
| D+H+R                    | 13,638                  | 47.17            | 12,062                  | 41.72            | 7,743                   | 26.78            |

2 \*(single) indicates that the genes were predicted by only one annotation method.

3 \*\*(more) indicates that the genes were annotated by at least two methods.

4

1 **Supplementary Table 7. Statistics of gene element length for seven sequenced**  
2 **plant species**

| Species                 | Protein-coding<br>gene number | Average<br>gene<br>length<br>(bp) | Average<br>CDS<br>length<br>(bp) | Average<br>exon<br>per<br>gene | Average<br>exon<br>length<br>(bp) | Average<br>intron<br>length<br>(bp) |
|-------------------------|-------------------------------|-----------------------------------|----------------------------------|--------------------------------|-----------------------------------|-------------------------------------|
| <i>D. catenatum</i>     | 28,910                        | 10,192.33                         | 1002.25                          | 4.13                           | 242.77                            | 2575.18                             |
| <i>P. equestris</i>     | 29,431                        | 9644.63                           | 897.62                           | 3.93                           | 228.27                            | 2922.24                             |
| <i>Z. mays</i>          | 38,510                        | 3965.59                           | 1101.62                          | 4.54                           | 242.75                            | 637.83                              |
| <i>S. bicolor</i>       | 27,159                        | 2942.10                           | 1261.01                          | 4.85                           | 259.90                            | 436.44                              |
| <i>O. sativa</i>        | 40,745                        | 2439.30                           | 1117.21                          | 4.18                           | 266.99                            | 415.17                              |
| <i>Phy. heterocycla</i> | 31,987                        | 4244.98                           | 1210.22                          | 5.28                           | 229.03                            | 440.95                              |
| <i>A. thaliana</i>      | 26,637                        | 1909.57                           | 1242.78                          | 5.23                           | 237.50                            | 157.54                              |

3

1 **Supplementary Table 8. Statistics for noncoding RNAs in *D. catenatum***

| <b>Type of noncoding<br/>DNA</b> |                   | <b>Copy<br/>number</b> | <b>Average length<br/>(bp)</b> | <b>Total length<br/>(bp)</b> | <b>% of<br/>genome</b> |
|----------------------------------|-------------------|------------------------|--------------------------------|------------------------------|------------------------|
| miRNA                            |                   | 49                     | 125.02                         | 6,126                        | 0.00052                |
| tRNA                             |                   | 310                    | 75.35                          | 23,357                       | 0.00199                |
| rRNA                             | rRNA              | 248                    | 235.25                         | 58,342                       | 0.00496                |
|                                  | 18S               | 107                    | 390.24                         | 41,756                       | 0.00355                |
|                                  | 28S               | 26                     | 146.85                         | 3,818                        | 0.00033                |
|                                  | 5.8S              | 14                     | 147.57                         | 2,066                        | 0.00018                |
|                                  | 5S                | 101                    | 105.96                         | 10,702                       | 0.00091                |
|                                  | snRNA             | 144                    | 117.74                         | 16,955                       | 0.00144                |
|                                  | CD-box            | 34                     | 108.65                         | 3,694                        | 0.00031                |
| snRNA                            | HACA-<br>splicing | 1                      | 166.00                         | 166                          | 0.00001                |
|                                  |                   | 109                    | 120.14                         | 13,095                       | 0.00111                |
|                                  | scaRNA            | 0                      | 0.00                           | 0                            | 0.00000                |

2

3

1 **Supplementary Table 9. GO term enrichment results of significantly expanded**  
2 **gene families in the *D. catenatum* lineage**

| GO ID      | GO Term                                                         | Class | P-value   | Adjusted P-value |
|------------|-----------------------------------------------------------------|-------|-----------|------------------|
| GO:0015074 | DNA integration                                                 | BP    | 2.03E-216 | 3.76E-214        |
| GO:0006259 | DNA metabolic process                                           | BP    | 2.64E-181 | 4.89E-179        |
| GO:0090304 | Nucleic acid metabolic process                                  | BP    | 3.13E-92  | 5.79E-90         |
| GO:0003964 | RNA-directed DNA polymerase activity                            | MF    | 1.06E-70  | 1.96E-68         |
| GO:0006278 | RNA-dependent DNA replication                                   | BP    | 1.06E-70  | 1.96E-68         |
| GO:0006952 | Defence response                                                | BP    | 3.48E-57  | 6.43E-55         |
| GO:0043531 | ADP binding                                                     | MF    | 1.92E-55  | 3.56E-53         |
| GO:0003723 | RNA binding                                                     | MF    | 9.04E-40  | 1.67E-37         |
| GO:0043170 | Macromolecule metabolic process                                 | BP    | 1.90E-38  | 3.51E-36         |
| GO:0044260 | Cellular macromolecule metabolic process                        | BP    | 2.49E-37  | 4.60E-35         |
| GO:0006950 | Response to stress                                              | BP    | 5.26E-28  | 9.74E-26         |
| GO:0004523 | Ribonuclease H activity                                         | MF    | 4.05E-25  | 7.49E-23         |
| GO:0003676 | Nucleic acid binding                                            | MF    | 5.27E-23  | 9.76E-21         |
| GO:0044238 | Primary metabolic process                                       | BP    | 5.45E-23  | 1.01E-20         |
| GO:0016772 | Transferase activity, transferring phosphorus-containing groups | MF    | 1.13E-13  | 2.10E-11         |
| GO:0004190 | Aspartic-type endopeptidase activity                            | MF    | 1.23E-12  | 2.27E-10         |
| GO:0046983 | Protein dimerisation activity                                   | MF    | 1.06E-11  | 1.96E-09         |
| GO:0034645 | Cellular macromolecule biosynthetic process                     | BP    | 3.07E-10  | 5.68E-08         |
| GO:0008152 | Metabolic process                                               | BP    | 5.77E-10  | 1.07E-07         |
| GO:0008270 | Zinc ion binding                                                | MF    | 1.67E-06  | 0.00030842       |
| GO:0016740 | Transferase activity                                            | MF    | 7.92E-06  | 0.00146498       |
| GO:0016788 | Hydrolase activity, acting on ester bonds                       | MF    | 5.57E-05  | 0.01029978       |
| GO:0009616 | Virus-induced gene silencing                                    | BP    | 0.0001058 | 0.01958041       |
| GO:0005488 | Binding                                                         | MF    | 0.0001069 | 0.01976832       |

3

4

1 **Supplementary Table 10. KEGG pathway enrichment results for SNP-related**  
2 **genes**

| Map ID   | Map title                             | <i>P</i> -value | Adjusted <i>P</i> -value |
|----------|---------------------------------------|-----------------|--------------------------|
| map01110 | Biosynthesis of secondary metabolites | 3.34E-08        | 4.27E-06                 |
| map04075 | Plant hormone signal transduction     | 7.00E-07        | 8.97E-05                 |
| map01100 | Metabolic pathways                    | 2.03E-05        | 0.002604                 |
| map00943 | Isoflavonoid biosynthesis             | 0.000167        | 0.021423                 |

3

4

1 **Supplementary Table 11. GO term enrichment results for SNP-related genes**

| GO_ID      | GO_Term                                                                                               | Class | P value  | Adjusted P value | GO level |
|------------|-------------------------------------------------------------------------------------------------------|-------|----------|------------------|----------|
| GO:0005488 | Binding                                                                                               | MF    | 1.72E-34 | 4.52E-31         | 2        |
| GO:0003824 | Catalytic activity                                                                                    | MF    | 1.31E-33 | 3.42E-30         | 2        |
| GO:0005515 | Protein binding                                                                                       | MF    | 1.94E-24 | 5.08E-21         | 3        |
| GO:0008152 | Metabolic process                                                                                     | BP    | 6.34E-18 | 1.66E-14         | 2        |
| GO:0030554 | Adenyl nucleotide binding                                                                             | MF    | 4.04E-16 | 1.06E-12         | 6        |
| GO:0032559 | Adenyl ribonucleotide binding                                                                         | MF    | 1.42E-15 | 3.72E-12         | 7        |
| GO:0005524 | ATP binding                                                                                           | MF    | 3.82E-15 | 1.00E-11         | 8        |
| GO:0016740 | Transferase activity                                                                                  | MF    | 4.68E-15 | 1.23E-11         | 3        |
| GO:0004713 | Protein tyrosine kinase activity                                                                      | MF    | 4.49E-13 | 1.18E-09         | 7        |
| GO:0016773 | Phosphotransferase activity, alcohol group as acceptor                                                | MF    | 4.49E-12 | 1.18E-08         | 5        |
| GO:0000166 | Nucleotide binding                                                                                    | MF    | 1.42E-11 | 3.72E-08         | 4        |
| GO:0036094 | Small molecule binding                                                                                | MF    | 1.62E-11 | 4.25E-08         | 3        |
| GO:0046914 | Transition metal ion binding                                                                          | MF    | 2.45E-11 | 6.41E-08         | 6        |
| GO:0016301 | Kinase activity                                                                                       | MF    | 2.96E-11 | 7.75E-08         | 5        |
| GO:0016310 | Phosphorylation                                                                                       | BP    | 4.58E-11 | 1.20E-07         | 6        |
| GO:0006468 | Protein phosphorylation                                                                               | BP    | 5.36E-11 | 1.41E-07         | 6        |
| GO:0004672 | Protein kinase activity                                                                               | MF    | 5.89E-11 | 1.54E-07         | 6        |
| GO:0017076 | Purine nucleotide binding                                                                             | MF    | 2.07E-10 | 5.42E-07         | 5        |
| GO:0006796 | Phosphate-containing compound metabolic process                                                       | BP    | 5.28E-10 | 1.38E-06         | 5        |
| GO:0032555 | Purine ribonucleotide binding                                                                         | MF    | 5.36E-10 | 1.40E-06         | 6        |
| GO:0016787 | Hydrolase activity                                                                                    | MF    | 5.76E-10 | 1.51E-06         | 3        |
| GO:0043412 | Macromolecule modification                                                                            | BP    | 6.15E-10 | 1.61E-06         | 4        |
| GO:0006464 | Protein modification process                                                                          | BP    | 6.47E-10 | 1.69E-06         | 5        |
| GO:0055114 | Oxidation-reduction process                                                                           | BP    | 1.13E-09 | 2.97E-06         | 3        |
| GO:0035639 | Purine ribonucleoside triphosphate binding                                                            | MF    | 1.87E-09 | 4.91E-06         | 7        |
| GO:0046872 | Metal ion binding                                                                                     | MF    | 3.71E-09 | 9.73E-06         | 5        |
| GO:0043169 | Cation binding                                                                                        | MF    | 4.47E-09 | 1.17E-05         | 4        |
| GO:0016705 | Oxidoreductase activity, acting on paired donors, with incorporation or reduction of molecular oxygen | MF    | 6.20E-09 | 1.62E-05         | 4        |
| GO:0016772 | Transferase activity, transferring phosphorus-containing groups                                       | MF    | 1.72E-08 | 4.51E-05         | 4        |
| GO:0016491 | Oxidoreductase activity                                                                               | MF    | 2.45E-08 | 6.41E-05         | 3        |
| GO:0005506 | Iron ion binding                                                                                      | MF    | 4.39E-08 | 0.000115         | 7        |
| GO:0044238 | Primary metabolic process                                                                             | BP    | 1.52E-07 | 0.000397         | 3        |

|            |                                                      |    |          |          |   |
|------------|------------------------------------------------------|----|----------|----------|---|
| GO:0020037 | Heme binding                                         | MF | 4.55E-07 | 0.001193 | 4 |
| GO:0046906 | Tetrapyrrole binding                                 | MF | 5.91E-07 | 0.001549 | 3 |
| GO:0043086 | Negative regulation of catalytic activity            | BP | 6.66E-07 | 0.001745 | 5 |
| GO:0042802 | Identical protein binding                            | MF | 9.41E-07 | 0.002466 | 4 |
| GO:0016798 | Hydrolase activity, acting on glycosyl bonds         | MF | 1.25E-06 | 0.003269 | 4 |
| GO:0043170 | Macromolecule metabolic process                      | BP | 1.34E-06 | 0.003503 | 3 |
| GO:0019222 | Regulation of metabolic process                      | BP | 1.53E-06 | 0.003998 | 3 |
| GO:0008017 | Microtubule binding                                  | MF | 2.18E-06 | 0.005704 | 6 |
| GO:0006950 | Response to stress                                   | BP | 2.61E-06 | 0.006825 | 3 |
| GO:0070011 | Peptidase activity, acting on L-amino acid peptides  | MF | 7.18E-06 | 0.018805 | 5 |
| GO:0006508 | Proteolysis                                          | BP | 8.11E-06 | 0.021247 | 5 |
| GO:0008233 | Peptidase activity                                   | MF | 8.49E-06 | 0.022255 | 4 |
| GO:0004553 | Hydrolase activity, hydrolysing O-glycosyl compounds | MF | 8.61E-06 | 0.02256  | 5 |

1

2

1    **Supplementary Table 12. Tandem duplicated genes in *D. catenatum* shown as**  
2    **gene pairs**

3    See separate Excel file.

4

5    **Supplementary Table 13. Tandem duplicated genes in *P. equestris* shown as gene**  
6    **pairs**

7    See separate Excel file.

8

9

1 **Supplementary Table 14. List of the resistant genes of *D. catenatum* and *P.***  
2 ***equestris***

|            | <i>D. catenatum</i> | <i>P. equestris</i> |
|------------|---------------------|---------------------|
| CC_NBS     | 14                  | 7                   |
| CC_NBS_LRR | 13                  | 8                   |
| NBS_LRR    | 47                  | 17                  |
| NBS        | 83                  | 47                  |

3

1 **Supplementary Table 15. Summary of orthologous gene families in 12 sequenced**  
2 **plant species**

3

| Species <sup>a</sup>   | Genes  | Unclustered genes | Genes in families | Family number | Unique families | Unique families genes | Common families | Common families genes | Single copy | Average genes per family |
|------------------------|--------|-------------------|-------------------|---------------|-----------------|-----------------------|-----------------|-----------------------|-------------|--------------------------|
| <i>A. thaliana</i>     | 26,637 | 3,614             | 23,023            | 12,517        | 741             | 2,844                 | 5,238           | 9,921                 | 677         | 1.839                    |
| <i>Am. trichopoda</i>  | 25,933 | 7,247             | 18,686            | 12,149        | 996             | 4,388                 | 5,238           | 7,108                 | 677         | 1.538                    |
| <i>B. distachyon</i>   | 26,415 | 3,555             | 22,860            | 14,987        | 386             | 1,133                 | 5,238           | 9,447                 | 677         | 1.525                    |
| <i>D. catenatum</i>    | 28,910 | 7,053             | 21,857            | 13,530        | 629             | 2,533                 | 5,238           | 8,381                 | 677         | 1.615                    |
| <i>M. acuminata</i>    | 34,241 | 8,632             | 25,609            | 12,497        | 540             | 1,361                 | 5,238           | 13,165                | 677         | 2.049                    |
| <i>O. sativa</i>       | 35,402 | 10,699            | 24,703            | 16,056        | 972             | 2,616                 | 5,238           | 9,305                 | 677         | 1.539                    |
| <i>Ph. dactylifera</i> | 23,890 | 6,280             | 17,610            | 10,660        | 428             | 1,339                 | 5,238           | 8,958                 | 677         | 1.652                    |
| <i>P. equestris</i>    | 29,431 | 7,955             | 21,476            | 13,617        | 621             | 2,799                 | 5,238           | 8,167                 | 677         | 1.577                    |
| <i>Po. trichocarpa</i> | 40,984 | 7,544             | 33,440            | 14,122        | 1,200           | 3,843                 | 5,238           | 13,929                | 677         | 2.368                    |
| <i>S. bicolor</i>      | 27,160 | 3,661             | 23,499            | 15,306        | 338             | 929                   | 5,238           | 9,645                 | 677         | 1.535                    |
| <i>Sp. polyrrhiza</i>  | 18,357 | 5,076             | 13,281            | 9,942         | 260             | 781                   | 5,238           | 7,044                 | 677         | 1.336                    |
| <i>V. vinifera</i>     | 25,328 | 6,007             | 19,321            | 12,551        | 617             | 1,797                 | 5,238           | 8,711                 | 677         | 1.539                    |

4 <sup>a</sup>, unique families, families only contained in one species.

5

1 **Supplementary Table 16. List of the putative genes involved in GM/GGM**  
2 **synthesis and hydrolysis in the *D. catenatum* genome**

3

| Function                      | Gene ID   | Name         | Protein<br>length (aa) | Phylogenetic<br>classification | Signal<br>peptide | TMD | Sequence<br>type |
|-------------------------------|-----------|--------------|------------------------|--------------------------------|-------------------|-----|------------------|
| Nucleotide-sugar<br>transport | Dca005389 | DcaNST/TPT1  | 349                    | Ia: URG <sup>T</sup> *1        | No                | 10  | Full             |
|                               | Dca012954 | DcaNST/TPT2  | 340                    | Ia: URG <sup>T</sup>           | No                | 10  | Full             |
|                               | Dca021203 | DcaNST/TPT3  | 348                    | Ia: URG <sup>T</sup>           | No                | 10  | Full             |
|                               | Dca005907 | DcaNST/TPT4  | 332                    | Ib: URG <sup>T</sup>           | No                | 10  | Full             |
|                               | Dca016070 | DcaNST/TPT5  | 335                    | Ib: URG <sup>T</sup>           | No                | 10  | Full             |
|                               | Dca017392 | DcaNST/TPT6  | 349                    | Ic: unknown                    | No                | 10  | Full             |
|                               | Dca024394 | DcaNST/TPT7  | 352                    | Ic: unknown                    | No                | 10  | Full             |
|                               | Dca002549 | DcaNST/TPT8  | 343                    | II: UTR <sup>+</sup> *2        | No                | 8   | Full             |
|                               | Dca010609 | DcaNST/TPT9  | 332                    | II: UTR                        | No                | 9   | Full             |
|                               | Dca005243 | DcaNST/TPT10 | 403                    | III: GONST <sup>+</sup> *3     | No                | 9   | Full             |
|                               | Dca001640 | DcaNST/TPT11 | 378                    | III: GONST                     | No                | 10  | Full             |
|                               | Dca006839 | DcaNST/TPT12 | 404                    | III: UTR                       | No                | 9   | Full             |
|                               | Dca008480 | DcaNST/TPT13 | 430                    | III: GONST                     | No                | 10  | Full             |
|                               | Dca017354 | DcaNST/TPT14 | 350                    | III: GONST                     | No                | 10  | Full             |
|                               | Dca006012 | DcaNST/TPT15 | 381                    | V: unknown                     | No                | 10  | Full             |
|                               | Dca011003 | DcaNST/TPT16 | 339                    | V: GONST                       | No                | 9   | Full             |
|                               | Dca019884 | DcaNST/TPT17 | 356                    | V: unknown                     | No                | 10  | Full             |
|                               | Dca013292 | DcaNST/TPT18 | 356                    | VI: unknown                    | No                | 10  | Full             |
|                               | Dca015521 | DcaNST/TPT19 | 318                    | VI: unknown                    | No                | 10  | Full             |
| GM/GGM backbone<br>synthesis  | Dca005598 | DcaCslA1     | 536                    | GT2 family CslA                | No                | 5   | Full             |
|                               | Dca006365 | DcaCslA2     | 499                    | GT2 family CslA                | Yes               | 5   | Full             |
|                               | Dca006366 | DcaCslA3     | 522                    | GT2 family CslA                | No                | 5   | Full             |
|                               | Dca006368 | DcaCslA4     | 588                    | GT2 family CslA                | Yes               | 5   | Full             |
|                               | Dca007032 | DcaCslA5     | 556                    | GT2 family CslA                | No                | 5   | Full             |
|                               | Dca007033 | DcaCslA6     | 302                    | GT2 family CslA                | No                | 4   | Fragment         |
|                               | Dca007034 | DcaCslA7     | 564                    | GT2 family CslA                | No                | 6   | Full             |
|                               | Dca007035 | DcaCslA8     | 599                    | GT2 family CslA                | Yes               | 5   | Full             |
|                               | Dca008185 | DcaCslA9     | 528                    | GT2 family CslA                | No                | 5   | Full             |
|                               | Dca013434 | DcaCslA10    | 550                    | GT2 family CslA                | No                | 5   | Full             |
|                               | Dca013437 | DcaCslA11    | 549                    | GT2 family CslA                | No                | 5   | Full             |
|                               | Dca018319 | DcaCslA12    | 227                    | GT2 family CslA                | No                | 0   | Fragment         |
|                               | Dca022357 | DcaCslA13    | 543                    | GT2 family CslA                | No                | 5   | Full             |
|                               | Dca000406 | DcaCslD1     | 581                    | GT2 family CslD                | No                | 6   | Fragment         |
|                               | Dca000653 | DcaCslD2     | 215                    | GT2 family CslD                | No                | 0   | Fragment         |
|                               | Dca000880 | DcaCslD3     | 1153                   | GT2 family CslD                | No                | 8   | Full             |
|                               | Dca008382 | DcaCslD4     | 1215                   | GT2 family CslD                | No                | 7   | Full             |
|                               | Dca011977 | DcaCslD5     | 1150                   | GT2 family CslD                | Yes               | 7   | Full             |

|                             |           |           |      |                            |     |    |          |
|-----------------------------|-----------|-----------|------|----------------------------|-----|----|----------|
|                             | Dca012337 | DcaCslD6  | 980  | GT2 family CslD            | No  | 7  | Fragment |
|                             | Dca018361 | DcaCslD7  | 383  | GT2 family CslD            | No  | 0  | Fragment |
|                             | Dca019887 | DcaCslD8  | 1172 | GT2 family CslD            | No  | 7  | Full     |
|                             | Dca024133 | DcaCslD9  | 1140 | GT2 family CslD            | No  | 7  | Full     |
| Mannan- synthesis related   | Dca004648 | Dca MSR1  | 413  | O-FucT <sup>*4</sup>       | No  | 1  | Full     |
| Acetylation                 | Dca002655 | DcaRWA1   | 546  | Acetyl-CoA T <sup>*5</sup> | No  | 14 | Full     |
|                             | Dca004270 | DcaRWA2   | 545  | Acetyl-CoA T               | No  | 14 | Full     |
|                             | Dca014073 | DcaRWA3   | 545  | Acetyl-CoA T               | No  | 14 | Full     |
| GM/GGM endolytic hydrolysis | Dca005404 | DcaGH5-1  | 469  | Mannase                    | No  | 1  | Full     |
|                             | Dca007362 | DcaGH5-2  | 432  | Mannase                    | Yes | 0  | Full     |
|                             | Dca012577 | DcaGH5-3  | 461  | Mannase                    | Yes | 0  | Full     |
|                             | Dca014087 | DcaGH5-4  | 421  | Mannase                    | Yes | 0  | Full     |
|                             | Dca014977 | DcaGH5-5  | 411  | Mannase                    | Yes | 0  | Full     |
|                             | Dca015452 | DcaGH5-6  | 429  | Mannase                    | Yes | 0  | Full     |
|                             | Dca018119 | DcaGH5-7  | 445  | Mannase                    | No  | 1  | Full     |
|                             | Dca019242 | DcaGH5-8  | 442  | Mannase                    | Yes | 0  | Full     |
|                             | Dca019243 | DcaGH5-9  | 439  | Mannase                    | Yes | 0  | Full     |
|                             | Dca027272 | DcaGH5-10 | 236  | Mannase                    | No  | 0  | Fragment |
|                             | Dca002938 | DcaGH5-11 | 549  | Cellulase                  | Yes | 0  | Full     |
|                             | Dca025213 | DcaGH5-12 | 524  | Cellulase                  | Yes | 0  | Full     |
|                             | Dca005521 | DcaGH5-13 | 300  | Unknown                    | No  | 0  | Fragment |
|                             | Dca018566 | DcaGH5-14 | 426  | Unknown                    | No  | 1  | Fragment |

1 The prediction of signal peptide and transmembrane domain (TMD) was performed by Phobius  
2 (<http://phobius.sbc.su.se/>). The Nucleotide sugar transporter/triosephosphate translocator family  
3 (NST/TPT) genes were divided into six groups based on the classification by Rautengarten et al.  
4 <sup>24</sup>. URG: UDP-rhamnose/UDP-galactose transporter<sup>\*1</sup>. UTR: UDP-galactose/UDP-glucose  
5 transporter<sup>\*2</sup>. GONST: Golgi-localised nucleotide-sugar transporter<sup>\*3</sup>. GDP-fucose protein O-  
6 fucosyltransferase<sup>\*4</sup>. Acetyl-CoA T: acetyl-CoA transporter<sup>\*5</sup>.

7

1 **Supplementary Table 17. List of the 75 MADS-box genes identified in *D.***  
2 ***catenatum***

| Gene ID   | Name     | ORF<br>(bp) | Protein<br>length (aa) | Type              | Subfamily | Pseudogene<br>(✓) |
|-----------|----------|-------------|------------------------|-------------------|-----------|-------------------|
| Dca006090 | DcMADS1  | 291         | 96                     | MIKC <sup>c</sup> | Bs        |                   |
| Dca006092 | DcMADS2  | 687         | 228                    | MIKC <sup>c</sup> | Bs        |                   |
| Dca021261 | DcMADS3  | 741         | 246                    | MIKC <sup>c</sup> | E         |                   |
| Dca022092 | DcMADS4  | 762         | 253                    | MIKC <sup>c</sup> | SQUA      |                   |
| Dca014289 | DcMADS5  | 792         | 263                    | Type I            | Mα        |                   |
| Dca012372 | DcMADS6  | 447         | 148                    | MIKC <sup>c</sup> | C/D       | ✓                 |
| Dca012374 | DcMADS7  | 255         | 84                     | MIKC <sup>c</sup> | C/D       |                   |
| Dca019419 | DcMADS8  | 753         | 250                    | MIKC <sup>c</sup> | SOC1      |                   |
| Dca002134 | DcMADS9  | 579         | 192                    | MIKC <sup>c</sup> | ANR1      |                   |
| Dca002135 | DcMADS10 | 624         | 207                    | MIKC <sup>c</sup> | ANR1      | ✓                 |
| Dca002136 | DcMADS11 | 951         | 316                    | MIKC <sup>c</sup> | ANR1      |                   |
| Dca023400 | DcMADS12 | 228         | 75                     | MIKC <sup>c</sup> | Bs        | ✓                 |
| Dca014821 | DcMADS13 | 186         | 61                     | MIKC <sup>c</sup> | AGL6      | ✓                 |
| Dca022131 | DcMADS14 | 555         | 184                    | Type I            | Mα        |                   |
| Dca005941 | DcMADS15 | 675         | 224                    | MIKC <sup>c</sup> | B_AP3     |                   |
| Dca002732 | DcMADS16 | 1059        | 352                    | Type I            | Mγ        |                   |
| Dca003023 | DcMADS17 | 735         | 244                    | MIKC <sup>c</sup> | E         |                   |
| Dca003026 | DcMADS18 | 687         | 228                    | MIKC <sup>c</sup> | SQUA      |                   |
| Dca003027 | DcMADS19 | 852         | 283                    | MIKC <sup>c</sup> | SQUA      | ✓                 |
| Dca028043 | DcMADS20 | 459         | 152                    | MIKC <sup>*</sup> |           |                   |
| Dca000690 | DcMADS21 | 633         | 210                    | MIKC <sup>c</sup> | B_PI      |                   |
| Dca027568 | DcMADS22 | 621         | 206                    | Type I            | Mα        |                   |
| Dca014095 | DcMADS23 | 708         | 235                    | Type I            | Mα        |                   |
| Dca018107 | DcMADS24 | 579         | 192                    | MIKC <sup>c</sup> | OsMADS32  |                   |
| Dca027941 | DcMADS25 | 678         | 225                    | Type I            | Mα        |                   |
| Dca011228 | DcMADS26 | 354         | 117                    | MIKC <sup>c</sup> | E         |                   |
| Dca003978 | DcMADS27 | 750         | 249                    | Type I            | Mγ        |                   |
| Dca000888 | DcMADS28 | 561         | 186                    | MIKC <sup>c</sup> | AGL6      | ✓                 |
| Dca000889 | DcMADS29 | 483         | 160                    | MIKC <sup>c</sup> | AGL6      |                   |
| Dca019204 | DcMADS30 | 1191        | 396                    | Type I            | Mα        |                   |
| Dca019205 | DcMADS31 | 726         | 241                    | Type I            | Mα        |                   |
| Dca013716 | DcMADS32 | 687         | 228                    | MIKC <sup>c</sup> | StMADS11  |                   |
| Dca018192 | DcMADS33 | 657         | 218                    | MIKC <sup>c</sup> | B_AP3     |                   |
| Dca028556 | DcMADS34 | 594         | 197                    | Type I            | Mγ        |                   |
| Dca022563 | DcMADS35 | 771         | 256                    | Type I            | Mγ        |                   |
| Dca018025 | DcMADS36 | 747         | 248                    | Type I            | Mγ        |                   |
| Dca016199 | DcMADS37 | 840         | 279                    | MIKC <sup>*</sup> |           |                   |
| Dca016201 | DcMADS38 | 930         | 309                    | MIKC <sup>*</sup> |           |                   |

|           |          |     |     |                   |            |   |
|-----------|----------|-----|-----|-------------------|------------|---|
| Dca014620 | DcMADS39 | 642 | 213 | MIKC <sup>c</sup> | SOC1       |   |
| Dca022549 | DcMADS40 | 957 | 318 | Type I            | M $\gamma$ |   |
| Dca019113 | DcMADS41 | 642 | 213 | MIKC <sup>c</sup> | B_AP3      |   |
| Dca017703 | DcMADS42 | 366 | 121 | MIKC <sup>c</sup> | SQUA       |   |
| Dca012304 | DcMADS43 | 687 | 228 | MIKC <sup>c</sup> | StMADS11   |   |
| Dca000568 | DcMADS44 | 534 | 177 | Type I            | M $\gamma$ |   |
| Dca006211 | DcMADS45 | 693 | 230 | Type I            | M $\alpha$ |   |
| Dca024877 | DcMADS46 | 690 | 229 | MIKC <sup>c</sup> | StMADS11   |   |
| Dca021832 | DcMADS47 | 447 | 148 | Type I            | M $\alpha$ |   |
| Dca021833 | DcMADS48 | 435 | 144 | Type I            | M $\alpha$ |   |
| Dca021834 | DcMADS49 | 159 | 52  | Type I            | M $\alpha$ | ✓ |
| Dca021835 | DcMADS50 | 306 | 101 | Type I            | M $\alpha$ |   |
| Dca025806 | DcMADS51 | 891 | 296 | Type I            | M $\gamma$ |   |
| Dca007552 | DcMADS52 | 348 | 115 | Type I            | M $\alpha$ |   |
| Dca000972 | DcMADS53 | 858 | 285 | Type I            | M $\gamma$ |   |
| Dca007676 | DcMADS54 | 903 | 300 | Type I            | M $\gamma$ |   |
| Dca007911 | DcMADS55 | 228 | 75  | MIKC <sup>c</sup> | AGL6       | ✓ |
| Dca007912 | DcMADS56 | 831 | 276 | MIKC <sup>c</sup> | SOC1       | ✓ |
| Dca006775 | DcMADS57 | 708 | 235 | Type I            | M $\alpha$ |   |
| Dca006778 | DcMADS58 | 405 | 134 | Type I            | M $\alpha$ |   |
| Dca018003 | DcMADS59 | 696 | 231 | MIKC <sup>c</sup> | ANR1       |   |
| Dca002059 | DcMADS60 | 738 | 245 | MIKC <sup>c</sup> | SQUA       |   |
| Dca003078 | DcMADS61 | 672 | 223 | MIKC <sup>c</sup> | C/D        |   |
| Dca005316 | DcMADS62 | 903 | 300 | Type I            | M $\gamma$ |   |
| Dca018065 | DcMADS63 | 732 | 243 | MIKC <sup>c</sup> | E          |   |
| Dca016730 | DcMADS64 | 732 | 243 | MIKC <sup>c</sup> | E          |   |
| Dca016731 | DcMADS65 | 213 | 70  | MIKC <sup>c</sup> | E          | ✓ |
| Dca019717 | DcMADS66 | 594 | 197 | Type I            | M $\gamma$ |   |
| Dca012472 | DcMADS67 | 669 | 222 | MIKC <sup>c</sup> | B_AP3      |   |
| Dca025329 | DcMADS68 | 321 | 106 | Type I            | M $\gamma$ |   |
| Dca027465 | DcMADS69 | 186 | 61  | MIKC <sup>*</sup> |            | ✓ |
| Dca027466 | DcMADS70 | 219 | 72  | MIKC <sup>*</sup> |            | ✓ |
| Dca016433 | DcMADS71 | 534 | 177 | Type I            | M $\alpha$ |   |
| Dca100001 | DcMADS72 | 702 | 233 | MIKC <sup>c</sup> | C/D        |   |
| Dca100002 | DcMADS73 | 705 | 234 | MIKC <sup>c</sup> | C/D        |   |
| Dca100003 | DcMADS74 | 720 | 239 | MIKC <sup>c</sup> | AGL6       |   |
| Dca100004 | DcMADS75 | 750 | 249 | MIKC <sup>c</sup> | AGL6       |   |

1  
2 ✓, represents this gene has been confirmed to be a pseudogene.  
3

1 **Supplementary Table 18. Summary of the *D. catenatum* genome assembly**  
2 **obtained with SOAPdenovo2**

|                    | Scaffold      |         | Contig        |         |
|--------------------|---------------|---------|---------------|---------|
|                    | Length (bp)   | Number  | Length (bp)   | Number  |
| Max length         | 877,183       |         | 91,298        |         |
| N10                | 244,122       | 385     | 19,843        | 3,963   |
| N20                | 176,768       | 1,007   | 14,350        | 10,171  |
| N30                | 136,595       | 1,823   | 11,014        | 18,435  |
| N40                | 104,922       | 2,881   | 8,603         | 29,087  |
| N50                | 80,559        | 4,262   | 6,641         | 42,800  |
| N60                | 59,509        | 6,092   | 5,024         | 60,690  |
| N70                | 40,171        | 8,668   | 3,589         | 84,991  |
| N80                | 22,185        | 12,879  | 2,267         | 121,038 |
| N90                | 7,287         | 22,166  | 1,085         | 186,167 |
| Total_length       | 1,266,461,387 |         | 1,034,236,810 |         |
| number>=200 bp     |               | 152,316 |               | 399,107 |
| number>=2000<br>bp |               | 35,958  |               | 131,334 |
| GC ratio           | 0.283         |         | 0.344         |         |

3

4

1 **Supplementary Table 19. Statistics of annotation results from various prediction**  
2 **methods**

| Gene set       |                        | Protein<br>coding<br>gene<br>number | Average<br>gene<br>length<br>(bp) | Average<br>CDS<br>length<br>(bp) | Average<br>exon<br>per<br>gene | Average<br>exon<br>length<br>(bp) | Average<br>intron<br>length<br>(bp) |
|----------------|------------------------|-------------------------------------|-----------------------------------|----------------------------------|--------------------------------|-----------------------------------|-------------------------------------|
| <i>De novo</i> | AUGUSTUS <sup>13</sup> | 59,666                              | 6528.212                          | 722.50                           | 3.12                           | 231.56                            | 2738.46                             |
|                | Glimmer <sup>14</sup>  | 47,655                              | 16276.84                          | 647.25                           | 4.12                           | 157.28                            | 5017.17                             |
| Homologue      | <i>A. thaliana</i>     | 24,593                              | 6369.03                           | 814.76                           | 3.51                           | 232.20                            | 2213.81                             |
|                | <i>O. sativa</i>       | 28,882                              | 5892.98                           | 781.940                          | 3.25                           | 240.49                            | 2270.06                             |
|                | <i>P. equestris</i>    | 41,596                              | 4580.33                           | 682.28                           | 2.84                           | 240.34                            | 2119.88                             |
|                | <i>S. bicolor</i>      | 26,286                              | 6001.77                           | 788.92                           | 3.42                           | 230.64                            | 2153.53                             |
|                | <i>Z. mays</i>         | 26,959                              | 5701.55                           | 764.15                           | 3.30                           | 231.56                            | 2146.65                             |
|                | RNA-seq                | 24,626                              | 12326.16                          | 1114.50                          | 4.40                           | 253.05                            | 2443.94                             |
|                | MAKER                  | 30,791                              | 10254.91                          | 989.99                           | 4.25                           | 232.98                            | 2628.63                             |
| Final set      |                        | 28,910                              | 10192.33                          | 1002.25                          | 4.13                           | 242.77                            | 2575.18                             |

3

4

1 **Supplementary Table 20. Statistics for gene function assignments from different**  
2 **databases**

|             |           | Number | Percent (%) |
|-------------|-----------|--------|-------------|
| Total       |           | 28,910 |             |
| Annotated   | InterPro  | 18,700 | 64.68       |
|             | GO        | 13,436 | 46.48       |
|             | KEGG      | 14,826 | 51.28       |
|             | SwissProt | 15,730 | 54.41       |
|             | TrEMBL    | 24,040 | 83.15       |
| Unannotated |           | 4,791  | 16.57       |

3

4

1 **Supplementary Table 21. Enriched KEGG pathways for *D. catenatum* specific**  
2 **gene families**

| Map ID   | Map Title                                                 | <i>P</i> -value | Adjusted <i>P</i> -value |
|----------|-----------------------------------------------------------|-----------------|--------------------------|
| map00350 | Tyrosine metabolism                                       | 1.98E-09        | 1.23E-07                 |
| map00071 | Fatty acid metabolism                                     | 1.12E-08        | 6.93E-07                 |
| map00010 | Glycolysis / Gluconeogenesis                              | 4.10E-05        | 0.002542                 |
| map00563 | Glycosylphosphatidylinositol<br>(GPI)-anchor biosynthesis | 0.000236        | 0.014633                 |

3

4

1 **Supplementary Table 22. GO term enrichment results for Orchidaceae-specific**  
2 **gene families.**

| GO_ID      | GO_Term                                                        | Class | <i>P</i> -value | Adjusted <i>P</i> -value |
|------------|----------------------------------------------------------------|-------|-----------------|--------------------------|
| GO:0003682 | Chromatin binding                                              | MF    | 1.08E-07        | 6.96E-05                 |
| GO:0006355 | Regulation of transcription, DNA-dependent                     | BP    | 4.77E-06        | 0.003067                 |
| GO:0010468 | Regulation of gene expression                                  | BP    | 8.86E-06        | 0.005698                 |
| GO:0019219 | Regulation of nucleobase-containing compound metabolic process | BP    | 1.43E-05        | 0.009205                 |
| GO:0003700 | Sequence-specific DNA binding transcription factor activity    | MF    | 3.07E-05        | 0.019718                 |
| GO:0003677 | DNA binding                                                    | MF    | 5.50E-05        | 0.035343                 |

3

4

1 **Supplementary Table 23. KEGG pathway enrichment results for Orchidaceae-**  
2 **specific gene families**

| Map ID   | Map Title                                                 | <i>P</i> -value | Adjusted <i>P</i> -value |
|----------|-----------------------------------------------------------|-----------------|--------------------------|
| map00563 | Glycosylphosphatidylinositol<br>(GPI)-anchor biosynthesis | 0.000242        | 0.020111                 |

3

4

1 **Supplementary Table 24. GO term enrichment results for monocot-specific gene**  
2 **families**

| GO ID      | GO Term                                                 | Class | <i>P</i> -value | Adjusted <i>P</i> -value |
|------------|---------------------------------------------------------|-------|-----------------|--------------------------|
| GO:0043531 | ADP binding                                             | MF    | 6.35E-17        | 6.61E-15                 |
| GO:0006952 | Defence response                                        | BP    | 2.05E-15        | 2.13E-13                 |
| GO:0050896 | Response to stimulus                                    | BP    | 2.99E-11        | 3.11E-09                 |
| GO:0015299 | Solute:hydrogen antiporter activity                     | MF    | 1.93E-05        | 0.002005                 |
| GO:0000156 | Two-component response regulator activity               | MF    | 3.31E-05        | 0.003442                 |
| GO:0000160 | Two-component signal transduction system (phosphorelay) | BP    | 7.74E-05        | 0.008047                 |

3

4

1 **Supplementary Table 25. KEGG pathway enrichment results for monocot-**  
2 **specific gene families**

| Map ID   | Map Title                                             | <i>P</i> -value | Adjusted <i>P</i> -value |
|----------|-------------------------------------------------------|-----------------|--------------------------|
| map03020 | RNA polymerase                                        | 1.51E-12        | 1.51E-11                 |
| map00240 | Pyrimidine metabolism                                 | 1.05E-10        | 1.05E-09                 |
| map00230 | Purine metabolism                                     | 2.56E-10        | 2.56E-09                 |
| map00941 | Flavonoid biosynthesis                                | 0.001048        | 0.010484                 |
| map00945 | Stilbenoid, diarylheptanoid and gingerol biosynthesis | 0.00191         | 0.019102                 |

3

4

1 **Supplementary Table 26. The sequences of konjac EST clones used in the *CsIA***  
2 **and *CsID* phylogenetic trees**

3

|             |               |                                                                                                                                                                                                                                                                                                                                                                                                                                                                                                                                                                                                                                                                                                                                                                                                                                                                 |
|-------------|---------------|-----------------------------------------------------------------------------------------------------------------------------------------------------------------------------------------------------------------------------------------------------------------------------------------------------------------------------------------------------------------------------------------------------------------------------------------------------------------------------------------------------------------------------------------------------------------------------------------------------------------------------------------------------------------------------------------------------------------------------------------------------------------------------------------------------------------------------------------------------------------|
| <i>CsIA</i> | <i>AkEST1</i> | TFFHSDTFLFLTISHHHLPEQVCRPAGPPMLLIAICFVRAWQLIFNLEVTDVDELPALEAGSDG<br>QIHVLHGGPILPPSRLIQRDPHSGRSVEAKEGVGGGAYFLLHGEVVVQGHFLYPHQALV<br>RVHEPPAGLDEGDVGVEGEEGDGAPEEVGLRLEVGVEDGHVVAVPDVAALHPLLEGARLVP<br>LPVVVDLVLDVDPLARPPALHLHQVLDNGVGGVIKDLNYDAIGRPGQPTCSANGELVHLL<br>LVVRSGIWTRTMGYAELPISTSSLMGSHLVPPLRPPAKELDEEDDDAHVHTLHEQHQRHGQA<br>QHHGTRSRGTMGTGARTCCHTSPICPARSSRPPLGMPAAGSSTRGAPSCTAPHARRRPTTGPE<br>PAGLRLLCLSCVFRFPPLFLILVRFSSVLHLSFYVRKNS                                                                                                                                                                                                                                                                                                                                                                                                                |
|             | <i>AkEST2</i> | RRKGSRSRCRCEGLCHLLASSSFGKIIAHIVTFIFYCVVIPITVFVPEVEIPKWGAIIYIPSVITLL<br>NAVGTPRSIIHLVFWILFENVMSVHRTKATFIGLLEAGRVNEWVVTEKLGDAKAKAAAAA<br>ASVNNKASKKPPPRFRIGDRLHVLELGVGAFLFFCACYDVAFGKNHFFIYLFQASFAFVV<br>VWCRESVDXXRSAXSXRDAYEYVVRRTTYT                                                                                                                                                                                                                                                                                                                                                                                                                                                                                                                                                                                                                           |
|             | <i>AkEST3</i> | LPDLVLDVDPLARPPALHLHQVLDNGVGGVIKDLNYDAIGRPGQPTCSANGELVHLLLVV<br>HGGFGRGPVGYAELPISTSSLMGSHLYRLSGRRPKSLTRSDDDAHRTHATDEQHQRHRTRH<br>STTATRSEGTMTGARTCCHTSPISPGHGSSRPSELASGQPGSSTERRSILHRSPRSPTHRSR<br>TRGLPPPLFILCSFSAPLPCF                                                                                                                                                                                                                                                                                                                                                                                                                                                                                                                                                                                                                                        |
| <i>CsID</i> | <i>AkEST1</i> | TGSLAVPREPLDAAIVAEAISVISCFYEDKTEWGRRVGWIYGSVTEDEVVTGYRMHNRGWRS<br>VYCVTKRDAFRGTAPINLTDRLHQVLRWATGSVEIFFSRNNALFASRRMKFLQRVAYFNVGM<br>YPFTSIFLIVYCTLPAMSLFSGKFIVQSLSVMFLTLLVITITLCLLAILEIRWSGITLHDWWRNE<br>QFWLIGGTSAPAAVLQGLLKVIAGVDISFTLTSPATDDNDDAFAELYVVKWSFLMVPPIIT<br>MMINMIAIAGVARTS                                                                                                                                                                                                                                                                                                                                                                                                                                                                                                                                                                       |
|             | <i>AkEST2</i> | KRHCTMASNNALKTSRSARLASSPSSLSASDVRPSVAGPLRPTVTFGRRTSSGRYVSYSRDDL<br>DSELGSGEFASYHVHIPATPDNQAETAPVDTSSISARVEEQYVSNSLFTGGFNSVTRAHMDK<br>VIESEASHPQMAGAKGSSCAIPGCGARVMSDERGNDILPCECDFKICAEFCADAVKGGEGVC<br>PGCKEPYKSTDMDEVNNAAGRPALSLPPPAGMTKMERRLSLMRS AKLTRSQTGDFDHN<br>WLFETKGTGYGNAFWPKENGSGSDGSSSGNGQPSSELSKWPWRPLTRKLKIPAAILSPYR<br>LLIFVRMAALGLFLAWRIKHKNEDAIWLWGMSVVCEVWFASFLLDQLPKLCPINRATDLA<br>VLKEKFEAPGAHNPTGKSDLPGIDVFVSTADPEKEPPLVTANTILSILAADYPVEKLACYVSD<br>DGGALLTFEAMAEAAASFANTWVPFCRKHDIEPRNPESYFSLKKDPYKNKLRPDFVKDRRRV<br>KREYDEFKVRINGLPDSIRRRSDAYHAREEIKAMKLQRETAGDEPLESVKIPKATWMADGTH<br>WPGTWTIPSAEHSRGDHAGIIQVMLKPPSDVPLHGDSEARLLDSDVDIRLPMLVYVSREK<br>RPGYDHNKKAGAMNALVRASAIMSNGPFILNDCDHYIYNSQALREGMCFMMDRGGDRIC<br>YVQFPQRFEGIDPSDRYANNNTVFVDVNMRALDGLQGPVYVGTGCLFRRIALYGFDPPrSKD<br>HSPGCCSCCFPRSRKGLVXXXXXXXXXXXXXGDELINISQEIWKLKHAH |
|             | <i>AkEST3</i> | QFWLIGGTSAPAAVLQGLLKVIAGIEISFTLTSSKAGDDVDDEFADLYVVKWTSMLMIPPIITF<br>VNIIAIVGFSRTIYSELPQWSRLLGGVXXXXVLALHLYPAKGLMGRGRTPPTIVFVWSGLIAI<br>TISLLWVAIKPPSGASQIGGSFTFP                                                                                                                                                                                                                                                                                                                                                                                                                                                                                                                                                                                                                                                                                                |

4

5

6

## Supplementary References

1. Wu, Z., Raven, P. H. & Hong, D. ed. *Flora of China* **25**, *Orchidaceae* (Beijing: Science Press & St. Louis: Missouri Botanical Garden Press. 2009).
2. Liu, Z. J. et al. Recent developments in the study of rapid propagation of *Dendrobium catenatum* Lindl. with a discussion on its scientific and Chinese names. *Plant Sci. J.* **29** (6): 763–772 (2011).
3. Wood, H. P. *The Dendrobiums* (A. R. G. Gantner Verlag Ruggell/Liechtenstein. 2006).
4. Kapitonov, V. V. & Jurka, J. A universal classification of eukaryotic transposable elements implemented in Repbase. *Nat. Rev. Genet.* **9**, 411–412; author reply 414 (2008).
5. Holt, C. & Yandell, M. MAKER2: an annotation pipeline and genome-database management tool for second-generation genome projects. *BMC Bioinformatics* **12**, 491 (2011).
6. Parra, G., Bradnam, K. & Korf, I. CEGMA: a pipeline to accurately annotate core genes in eukaryotic genomes. *Bioinformatics* **23**, 1061–1067 (2007).
7. Guindon, s. et al. New algorithms and methods to estimate maximum-likelihood phylogenies: assessing the performance of PhyML 3.0. *Syst. Biol.* **58**, 307–321 (2010).
8. Gaut, B. S., Morton, B. R., McCaig, B. C. & Clegg, M. T. Substitution rate comparisons between grasses and palms: synonymous rate differences at the nuclear gene *Adh* parallel rate differences at the plastid gene *rbcL*. *Proc. Natl Acad. Sci. USA* **93**, 10274–10279 (1996).
9. Maere, S. et al. Modeling gene and genome duplications in eukaryotes. *Proc. Natl Acad. Sci. USA* **102**, 5454–5459 (2005).
10. Gille, S. et al. Deep sequencing of voodoo lily (*Amorphophallus konjac*): an approach to identify relevant genes involved in the synthesis of the hemicellulose glucomannan. *Planta* **234**, 515–526 (2011).

- 1 11. Reyes, F. & Orellana, A. Golgi transporters: opening the gate to cell wall  
2 polysaccharide biosynthesis. *Curr. Opin. Plant Biol.* **11**, 244–251 (2008).
- 3 12. Xing, X. *et al.* A review of isolation process, structural characteristics, and  
4 bioactivities of water-soluble polysaccharides from *Dendrobium* plants.  
5 *Bioactive Carbohydrates and Dietary Fibre* **1**, 131–147 (2013).
- 6 13. Katsuraya, K. *et al.* Constitution of konjac glucomannan: chemical analysis and  
7 <sup>13</sup>C NMR spectroscopy, *Carbohydr. Polym.* **53**, 183–189 (2003).
- 8 14. Wang, J.H., Zha, X.Q., Luo, J.P. & Yang, X.F. An acetylated  
9 galactomannoglucan from the stems of *Dendrobium nobile* Lindl. *Carbohydr.*  
10 *Res.* **345**, 1023–1027 (2010).
- 11 15. Vieira, M.C. & Gil A.M. A solid state NMR study of locust bean gum  
12 galactomannan and Konjac glucomannan gels. *Carbohydr. Polym.* **60**, 439–448  
13 (2005).
- 14 16. Rennie E.A & Scheller H.V. Xylan biosynthesis. *Curr. Opin. Biotechnol.* **26**,  
15 100–107 (2014).
- 16 17. Hsieh, Y.S. *et al.* Structure and bioactivity of the polysaccharides in medicinal  
17 plant *Dendrobium huoshanense*. *Bioorgan. Med. Chem.* **16**, 6054–6058 (2008).
- 18 18. Wang, Y., Mortimer, J.C., Davis, J., Dupree, P. & Keegstra, K. Identification of  
19 an additional protein involved in mannan biosynthesis. *Plant J.* **73**, 105–117  
20 (2013).
- 21 19. Cribb P.J. *The Genus Paphiopedilum, 2nd edn.* Natural History Publications,  
22 Kota Kinabalu and Kew (1998).
- 23 20. URL: <http://www.photoshop.com/>
- 24 21. Kilian, J. *et al.* The AtGenExpress global stress expression data set: protocols,  
25 evaluation and model data analysis of UV-B light, drought and cold stress  
26 responses. *Plant Journal* **50** (2), 347–363 (2007).
- 27 22. Winter, D. *et al.* An "Electronic Fluorescent Pictograph" browser for exploring  
28 and analyzing large-scale biological data sets. *PLoS ONE* **2**(8), e718 (2007).
- 29 23. Jain, M. *et al.* F-box proteins in rice. Genome-wide analysis, classification,

- 1 temporal and spatial gene expression during panicle and seed development, and  
2 regulation by light and abiotic stress. *Plant Physiology* **143(4)**, 1467–1483  
3 (2007).
- 4 24. Rautengarten, C. *et al.* The Golgi localized bifunctional UDP-rhamnose/UDP-  
5 galactose transporter family of Arabidopsis. *Proc. Natl Acad. Sci. USA* **111(31)**,  
6 11563–11568 (2014).
